# Supplementary material
Source: PubMed Central journal article supplement (PMC8673193)
Supplement: NIHMS1762822-supplement-Supp_Info.pdf [file NIHMS1762822-supplement-Supp_Info.pdf]

## Supplementary Information

# 2-Aminopyridine Nucleobase Improves Triple Helical Recognition of RNA and DNA when Used Instead of Pseudoisocytosine in Peptide Nucleic Acids

Christopher A. Ryan, Nikita Brodyagin, Justin Lok, and Eriks Rozners\*

Department of Chemistry, Binghamton University, The State University of New York, Binghamton, New York 13902, United States.

**Table S1.** Deconvolution of LCMS analysis of synthesized PNAs.

|              | <b>Mass<sub>(calc)</sub></b> | <b>Mass (M+6, M+5...)</b> |
|--------------|------------------------------|---------------------------|
| <b>PNA1</b>  | 2349                         | 471, 588, 784, 1176       |
| <b>PNA2</b>  | 2381                         | 477, 596, 795, 1191       |
| <b>PNA3</b>  | 2451                         | 491, 614, 818, 1173       |
| <b>PNA4</b>  | 2366                         | 474, 593, 790, 1184       |
| <b>PNA5</b>  | 3413                         | 684, 854, 1139, 1708      |
| <b>PNA6</b>  | 3516                         | 704, 880, 1173, 1759      |
| <b>PNA7</b>  | 3833                         | 768, 959, 1279, 1918      |
| <b>PNA8</b>  | 3816                         | 764, 955, 1273, 1909      |
| <b>PNA9</b>  | 3833                         | 768, 959, 1279, 1918      |
| <b>PNA10</b> | 5008                         | 836, 1002, 1253, 1670     |
| <b>PNA11</b> | 6944                         | 1131, 1319, 1583, 1979    |
| <b>PNA12</b> | 6893                         | 1124, 1311, 1573, 1966    |

<Chromatogram>

mAU

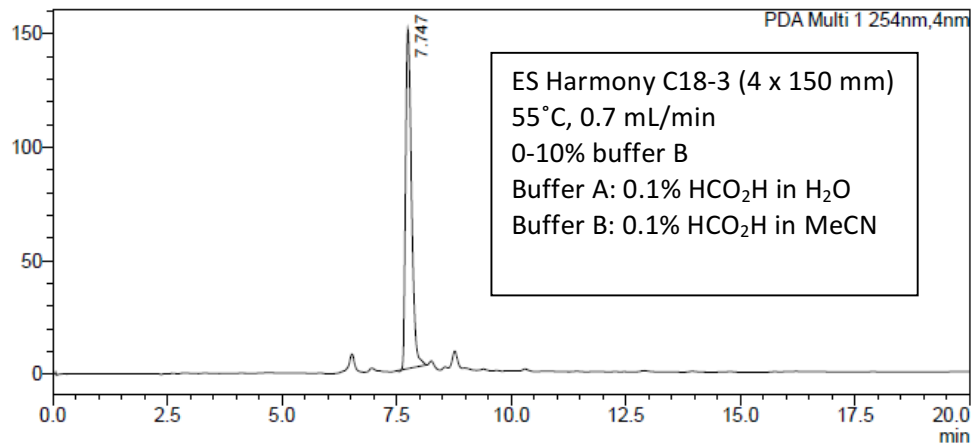

<Chromatogram>

mAU

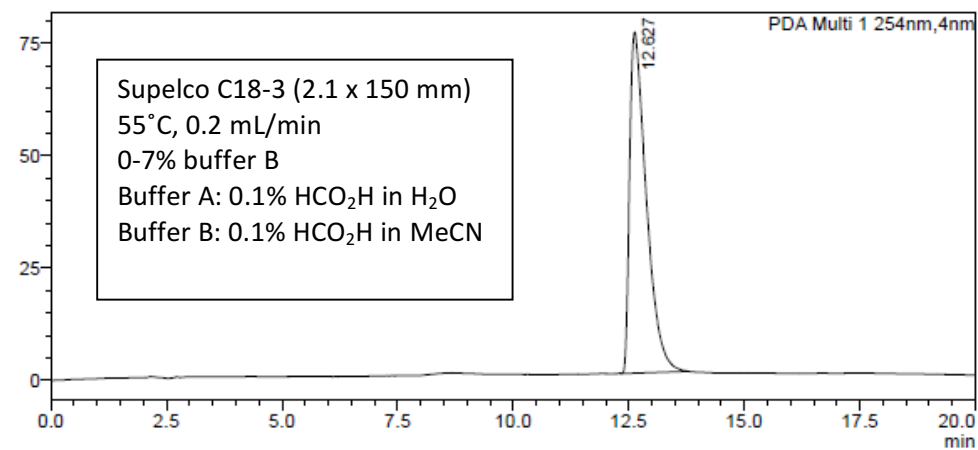

MS Spectrum

Line#1 R.Time:12.883(Scan#624)  
MassPeaks:2033  
Spectrum Mode:Single 12.883(624) Base Peak:470.90(2952107)  
BG Mode:None Segment 1 - Event 1

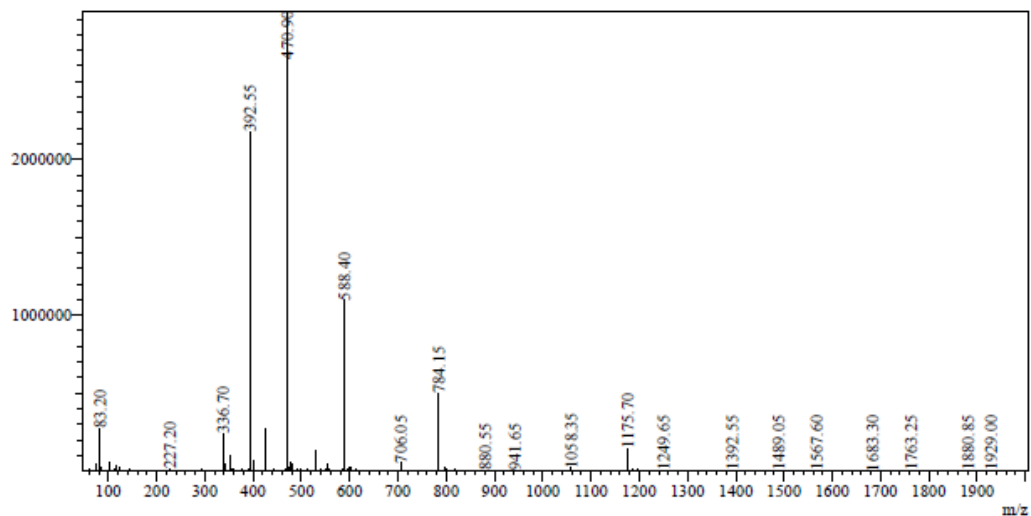

Figure S1. Crude (top) and purified (middle) chromatograms and mass spectrum (bottom) for PNA1.

<Chromatogram>

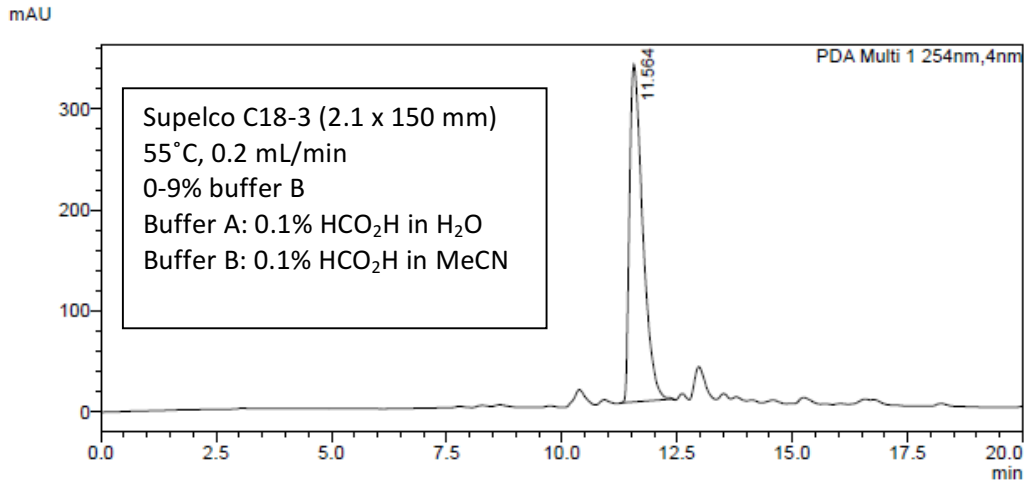

<Chromatogram>

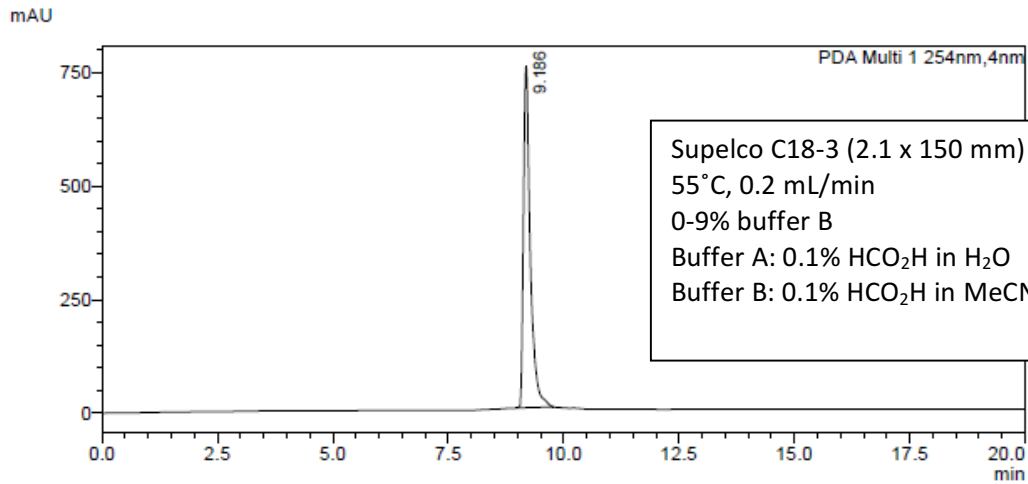

MS Spectrum

Line#1 R. Time:----(Scan#:----)

MassPeaks:1442

Spectrum Mode:Averaged 9.417-9.450(416-418) Base Peak:477.25(9444283)

BG Mode:Calc Segment 1 - Event 1

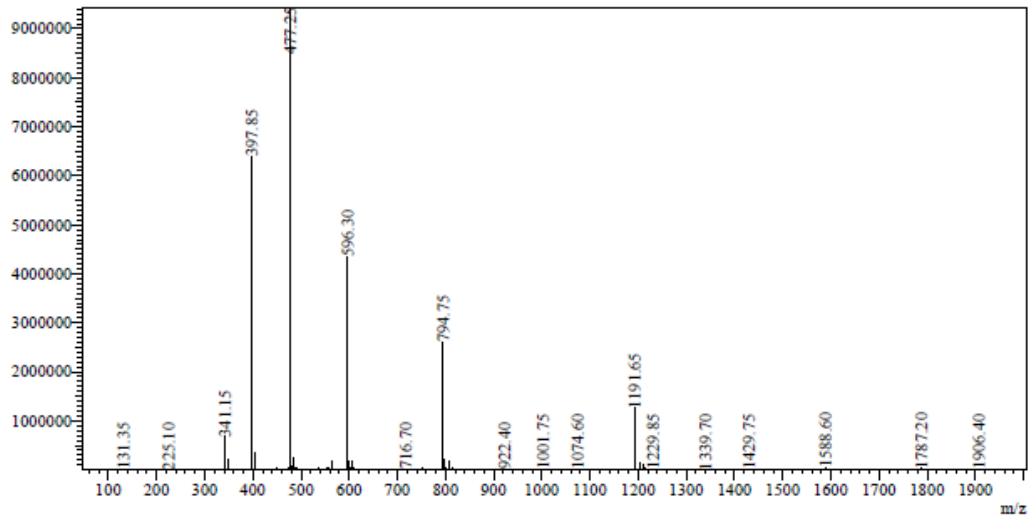

Figure S2. Crude (top) and purified (middle) chromatograms and mass spectrum (bottom) for PNA2.

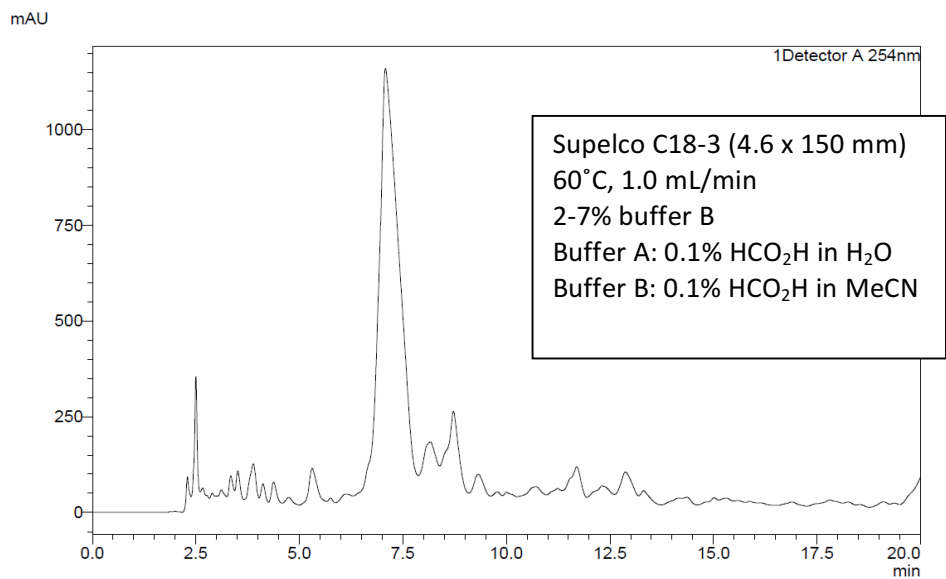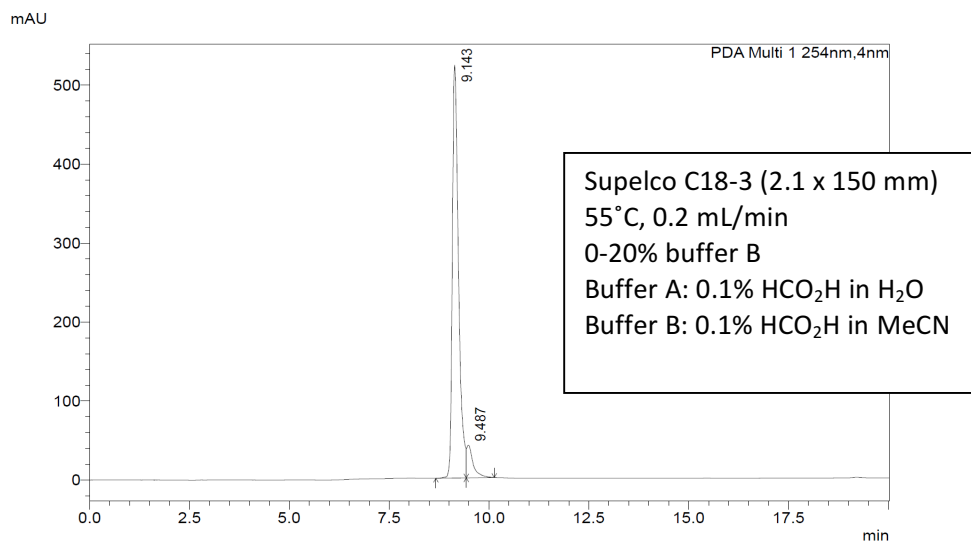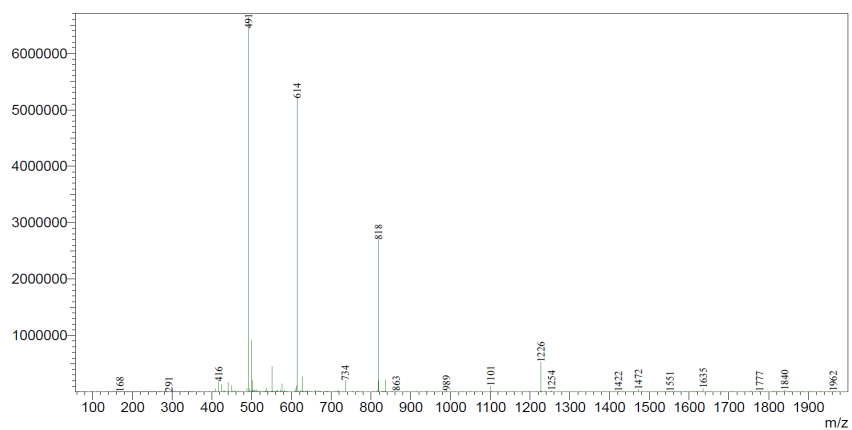

**Figure S3.** Crude (top) and purified (middle) chromatograms and mass spectrum (bottom) for **PNA3**.

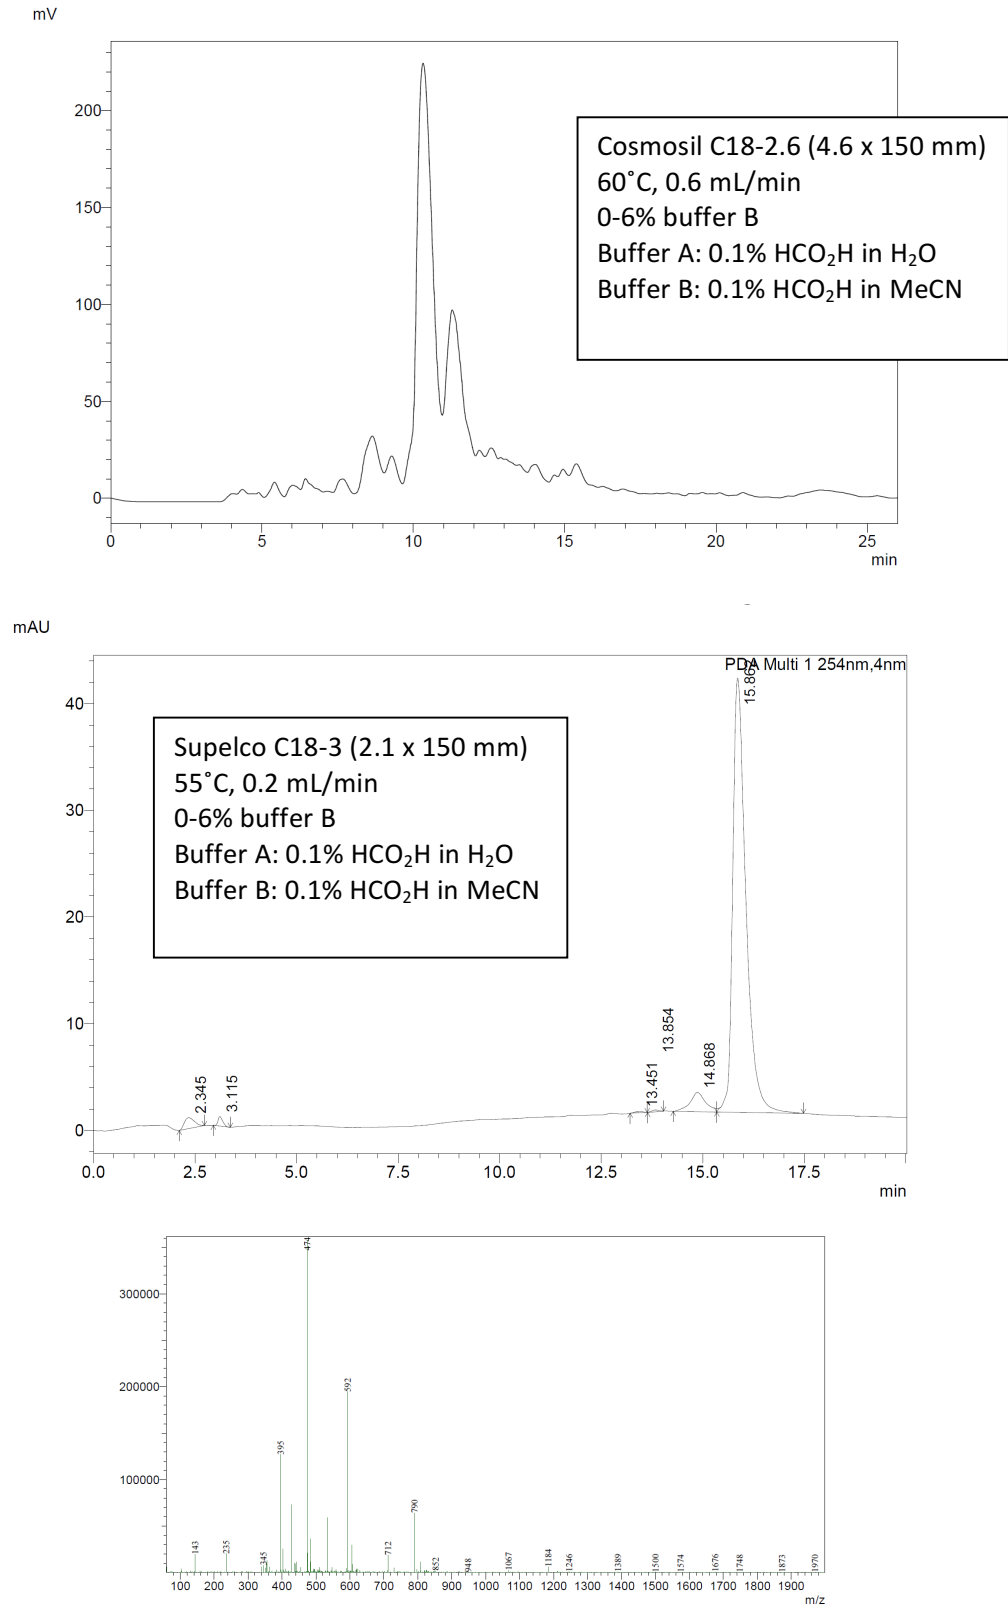

**Figure S4.** Crude (top) and purified (middle) chromatograms and mass spectrum (bottom) for **PNA4**.

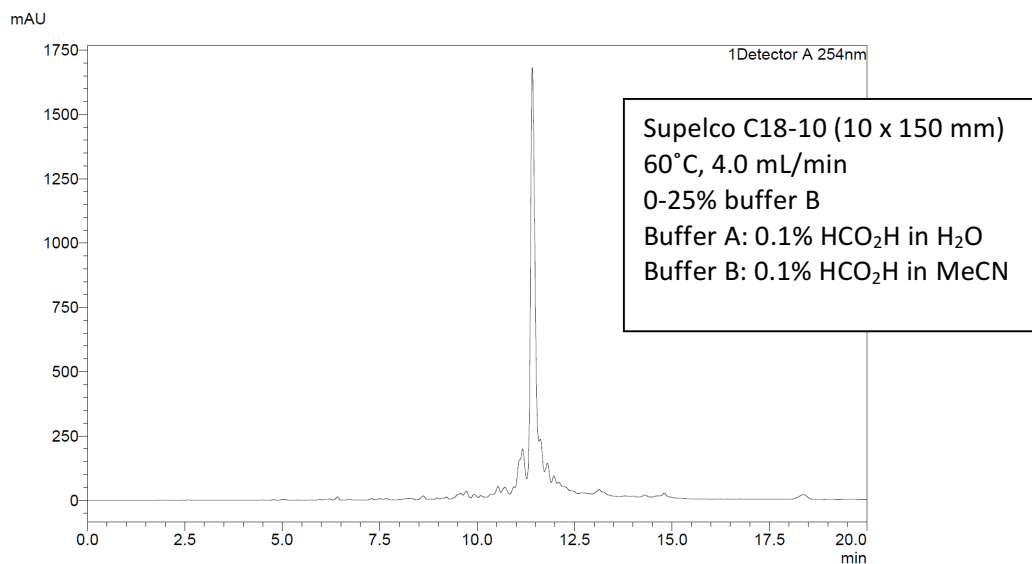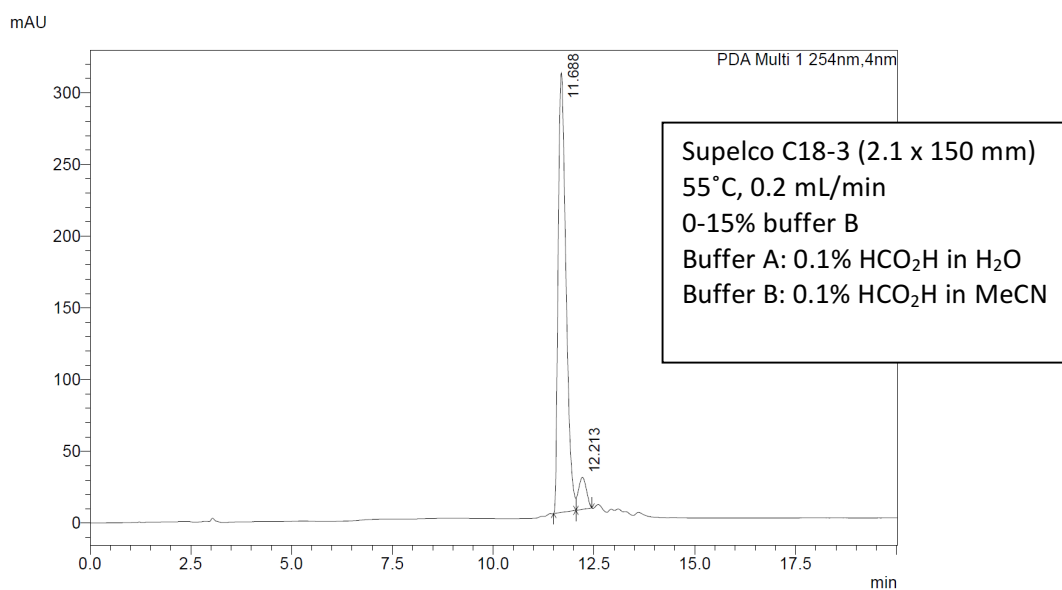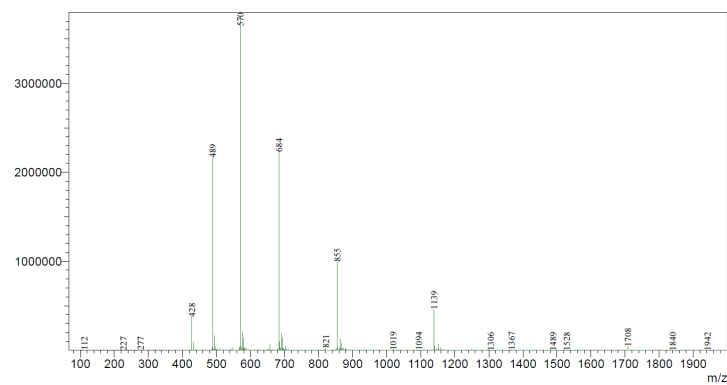

**Figure S5.** Crude (top) and purified (middle) chromatograms and mass spectrum (bottom) for PNA5.

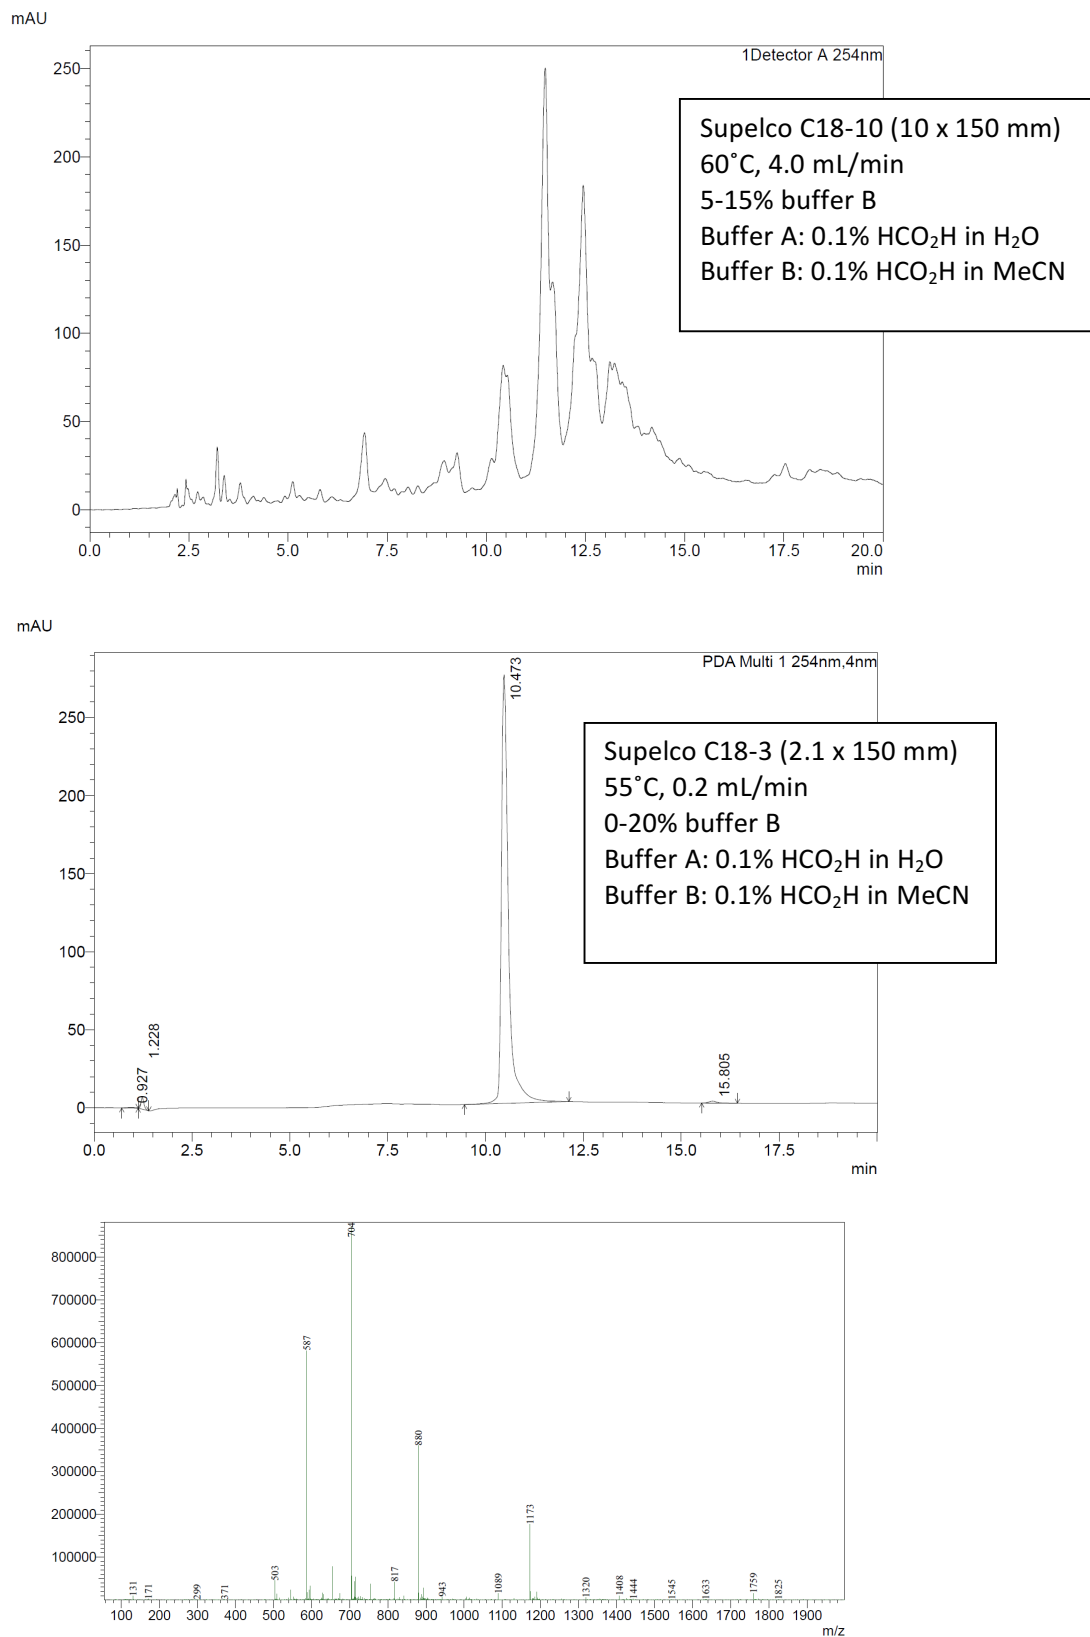

**Figure S6.** Crude (top) and purified (middle) chromatograms and mass spectrum (bottom) for **PNA6**.

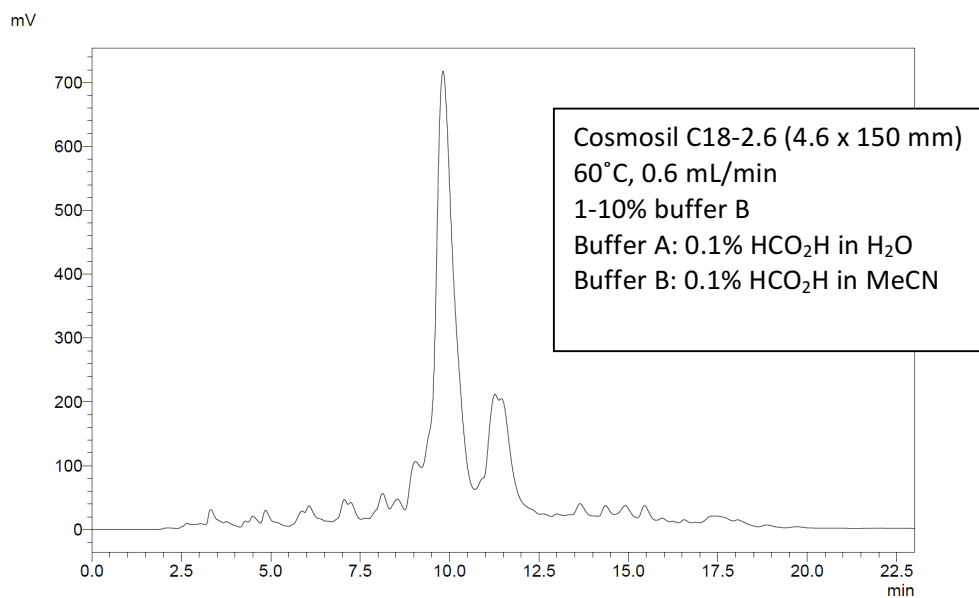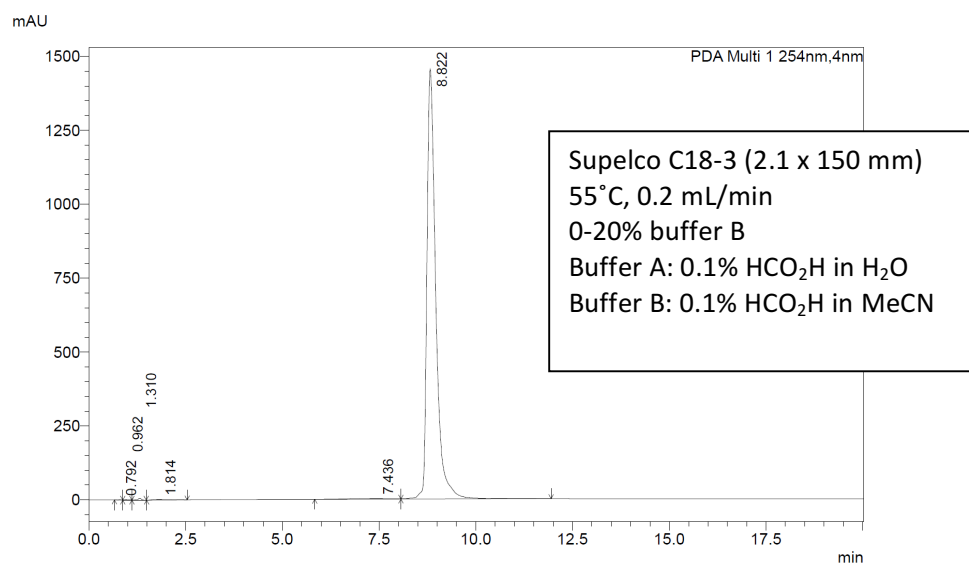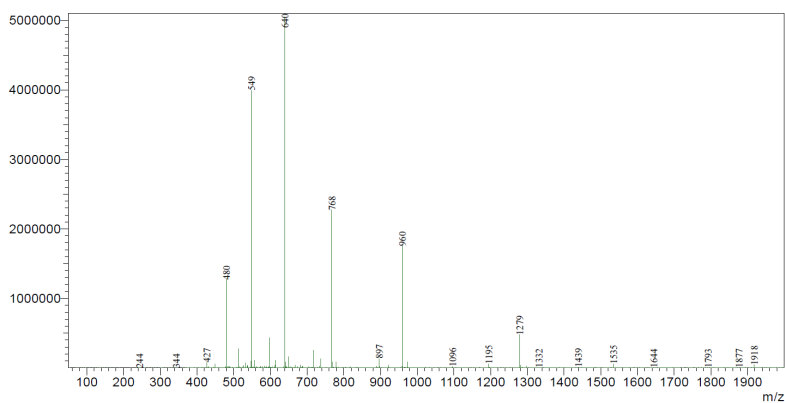

**Figure S7.** Crude (top) and purified (middle) chromatograms and mass spectrum (bottom) for **PNA7**.



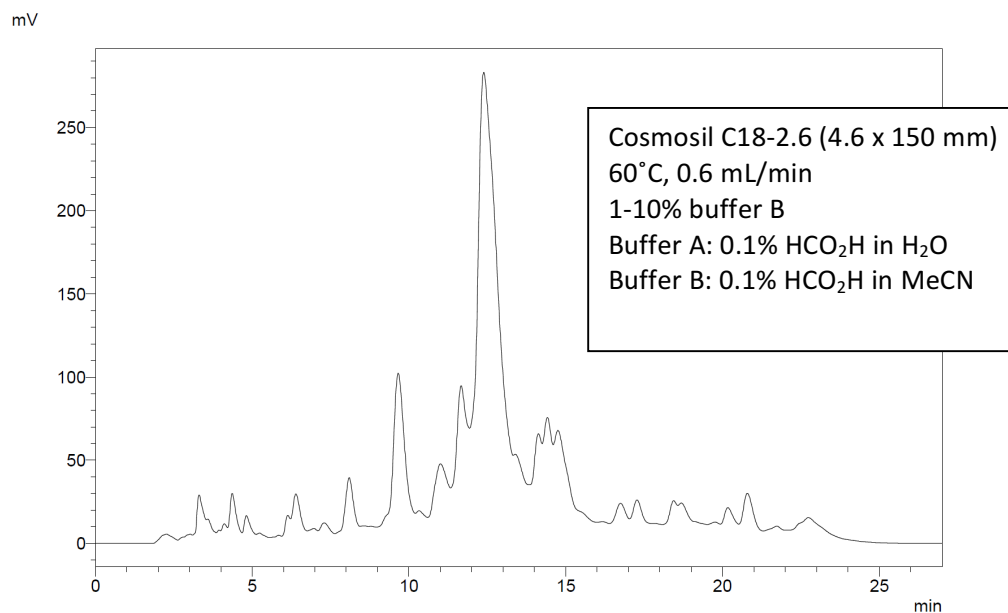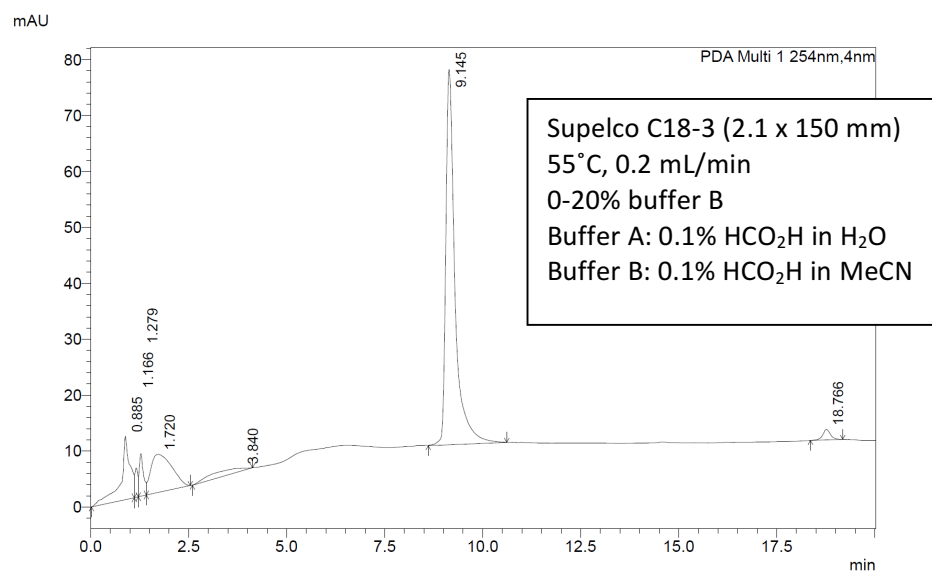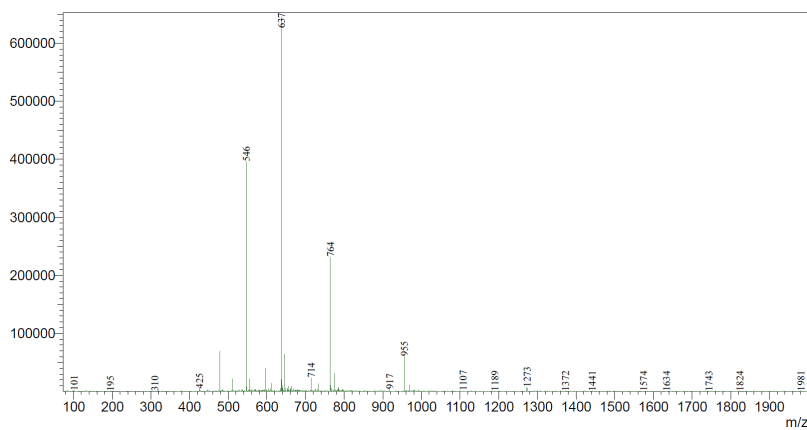

**Figure S9.** Crude (top) and purified (middle) chromatograms and mass spectrum (bottom) for **PNA8**.

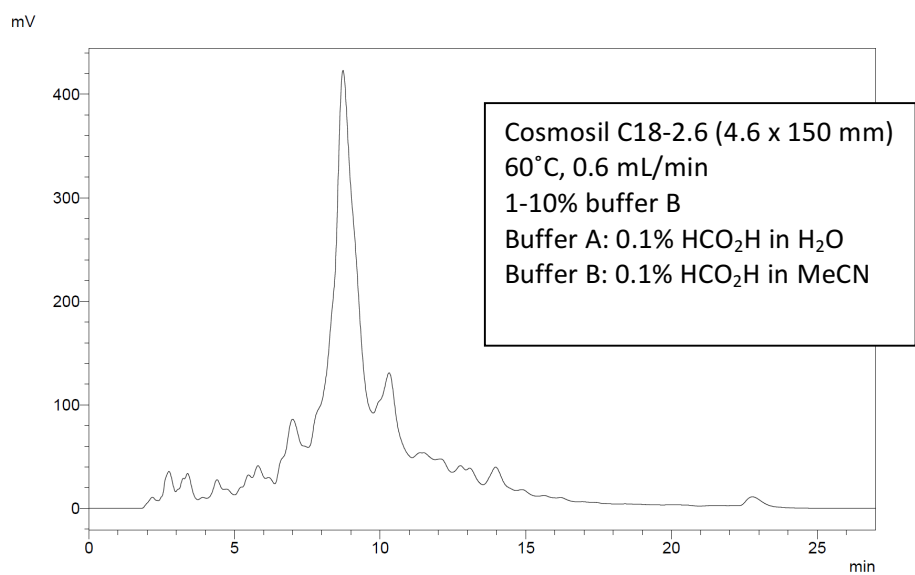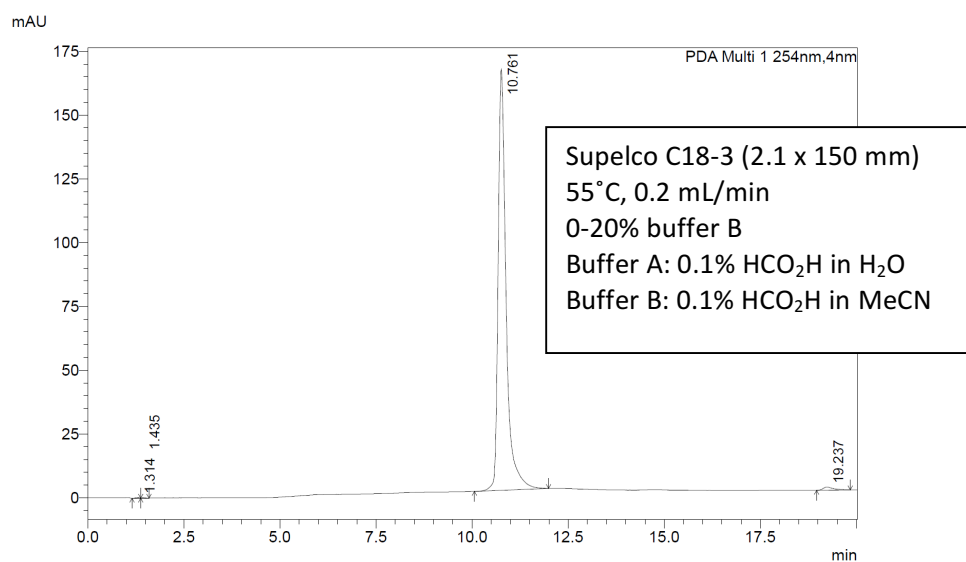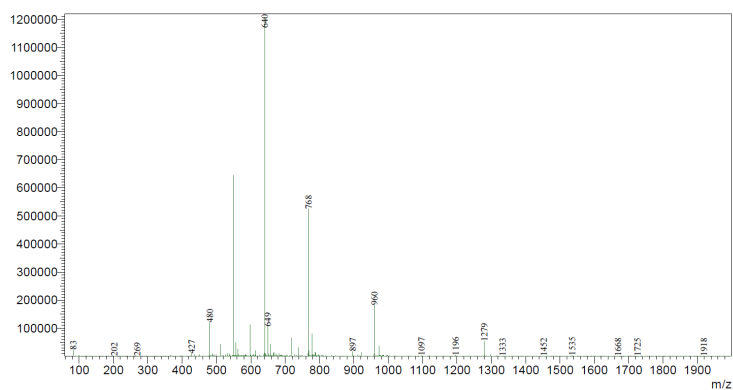

**Figure S8.** Crude (top) and purified (middle) chromatograms and mass spectrum (bottom) for **PNA9**.

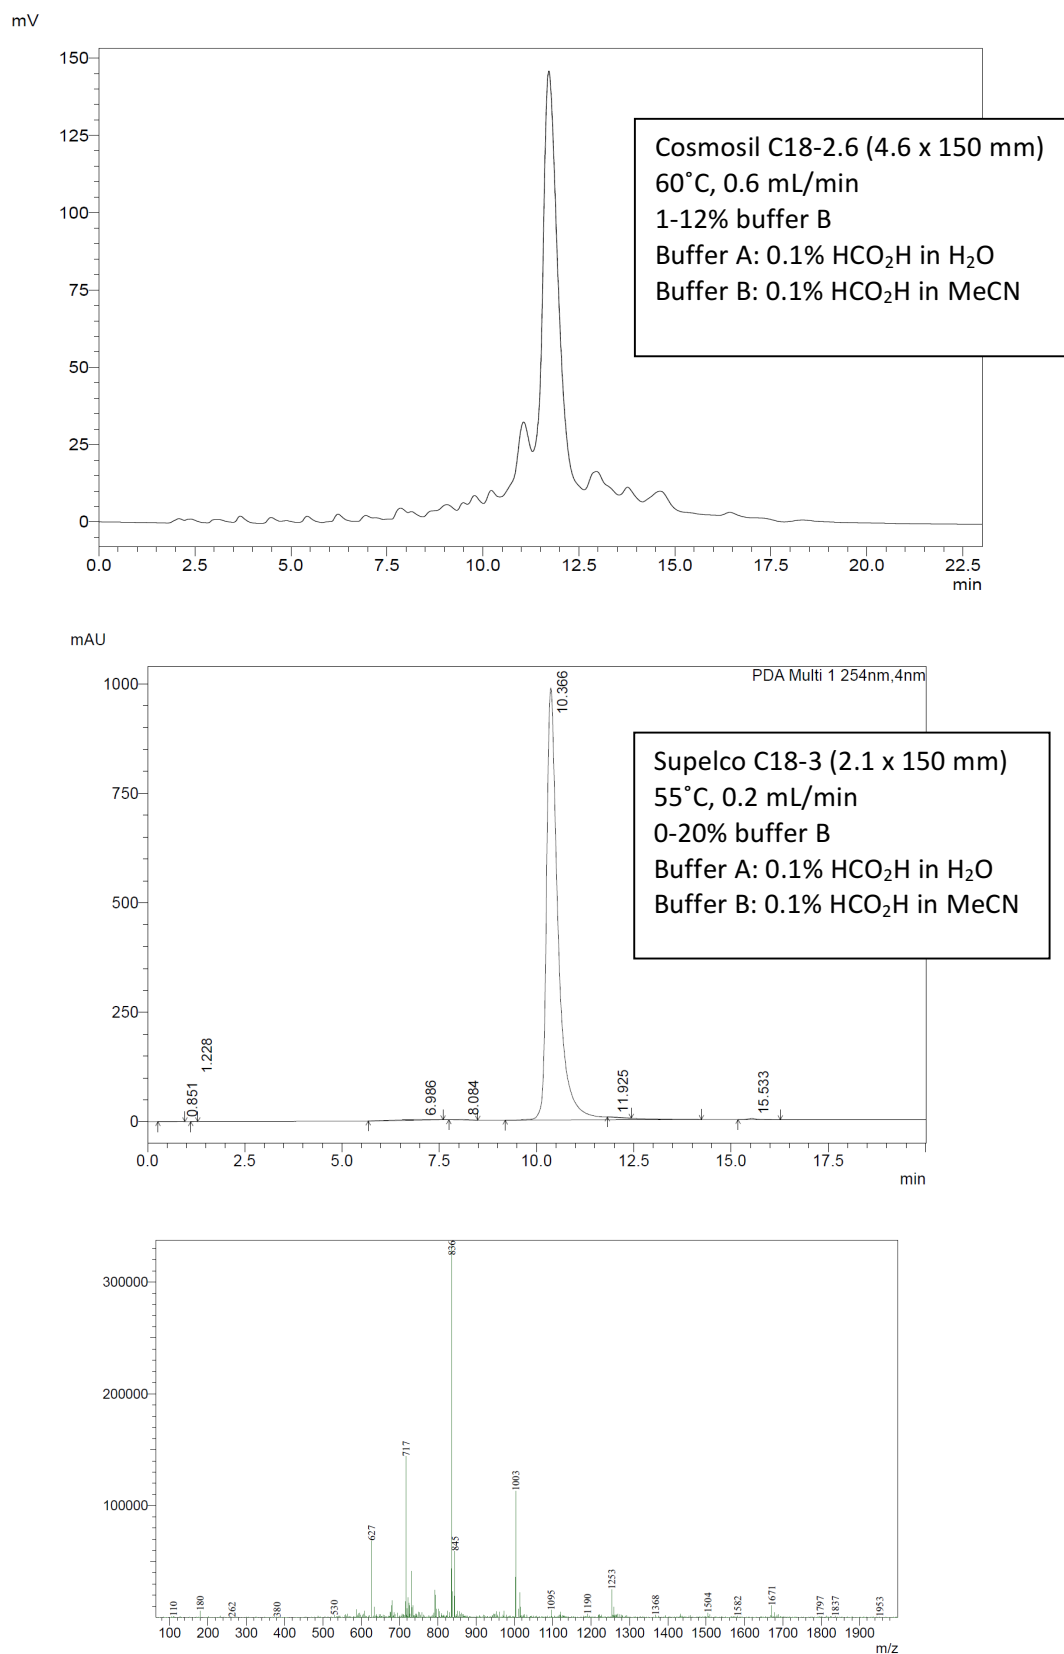

**Figure S10.** Crude (top) and purified (middle) chromatograms and mass spectrum (bottom) for **PNA10**.

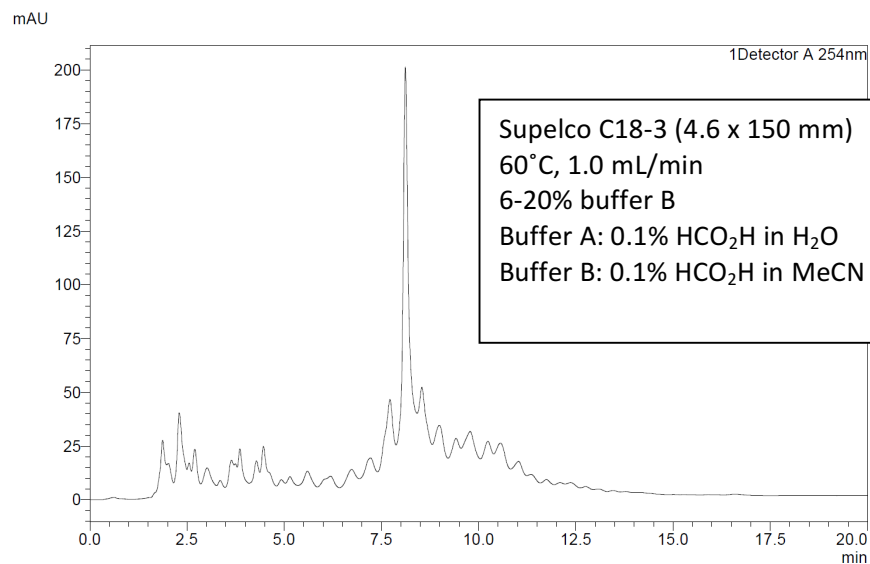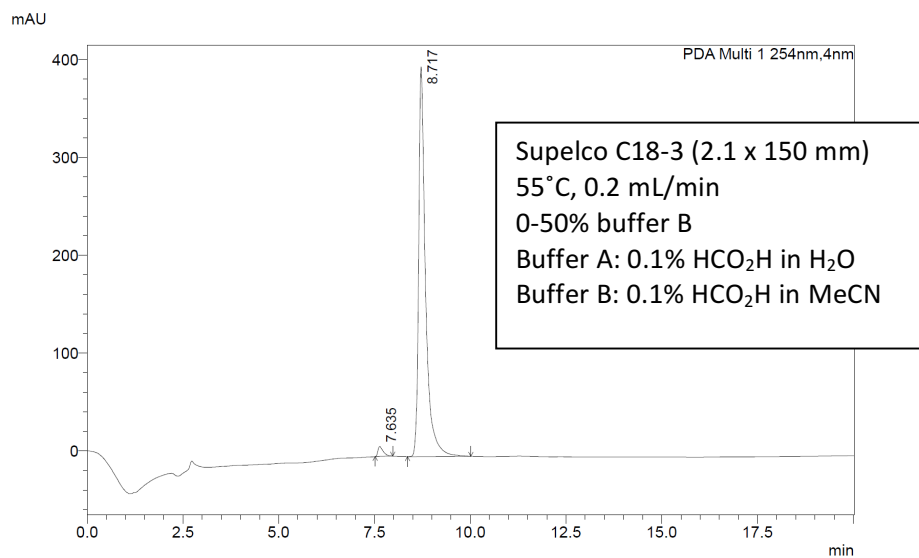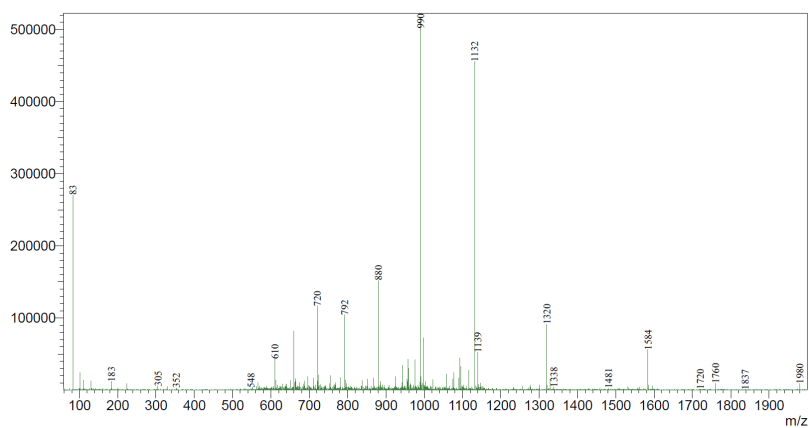

**Figure S11.** Crude (top) and purified (middle) chromatograms and mass spectrum (bottom) for **PNA11**.

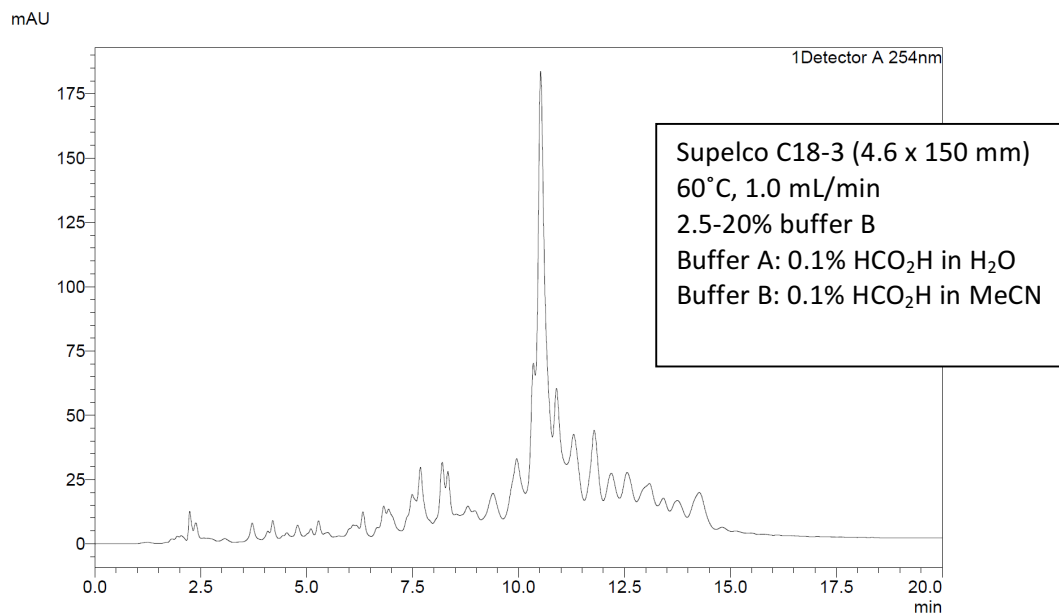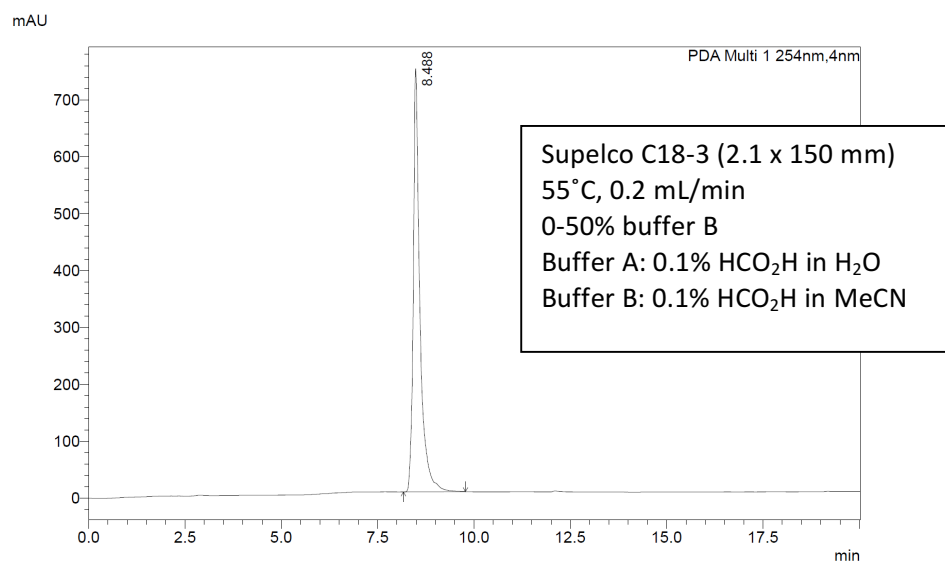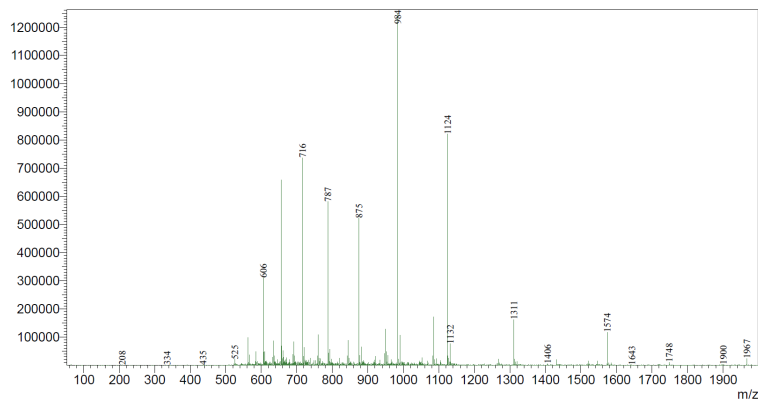

Figure S12. Crude (top) and purified (middle) chromatograms and mass spectrum (bottom) for PNA12.

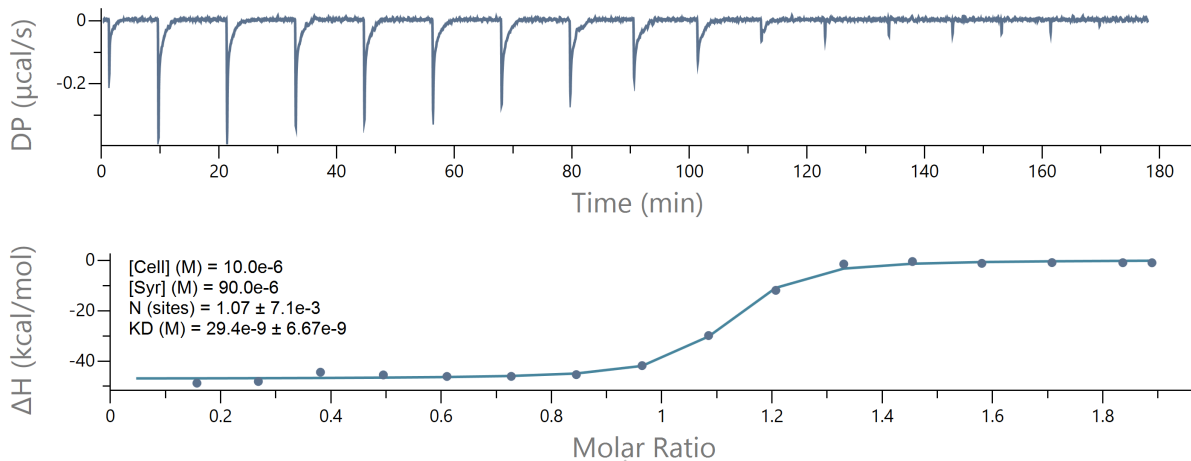

**Figure S13.** Representative ITC result of PNA1 against rHRP1.

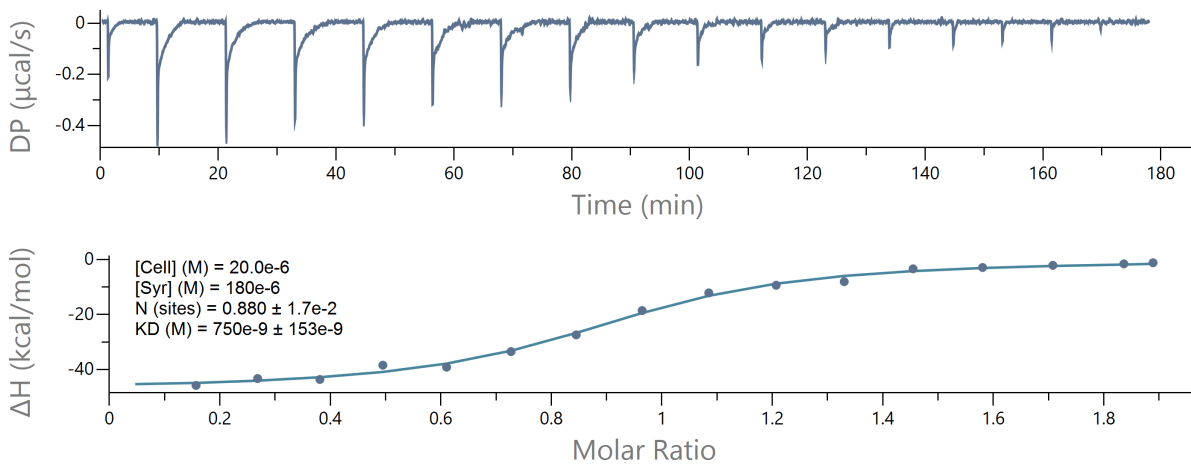

**Figure S14.** Representative ITC result of PNA1 against rHRP2.

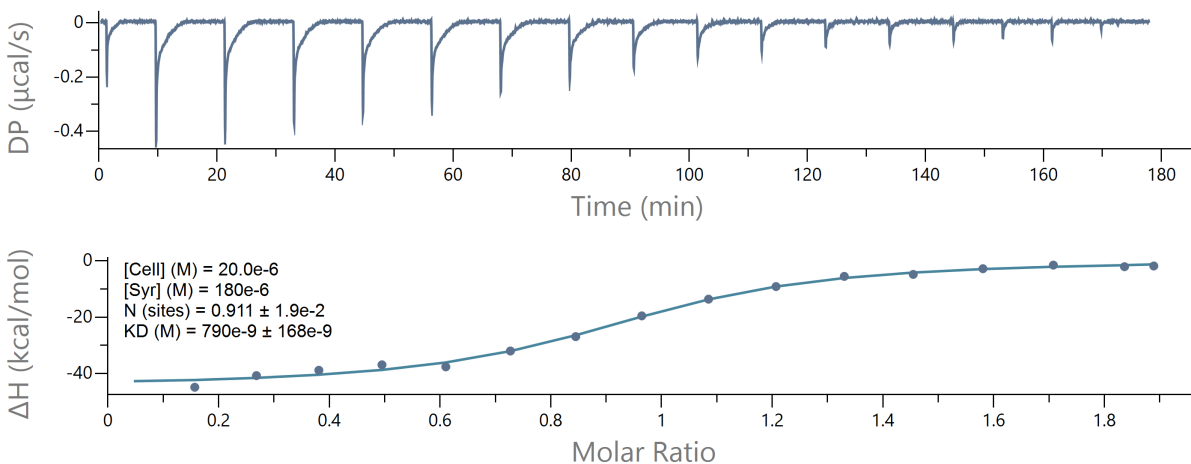

**Figure S15.** Representative ITC result of PNA1 against rHRP3.

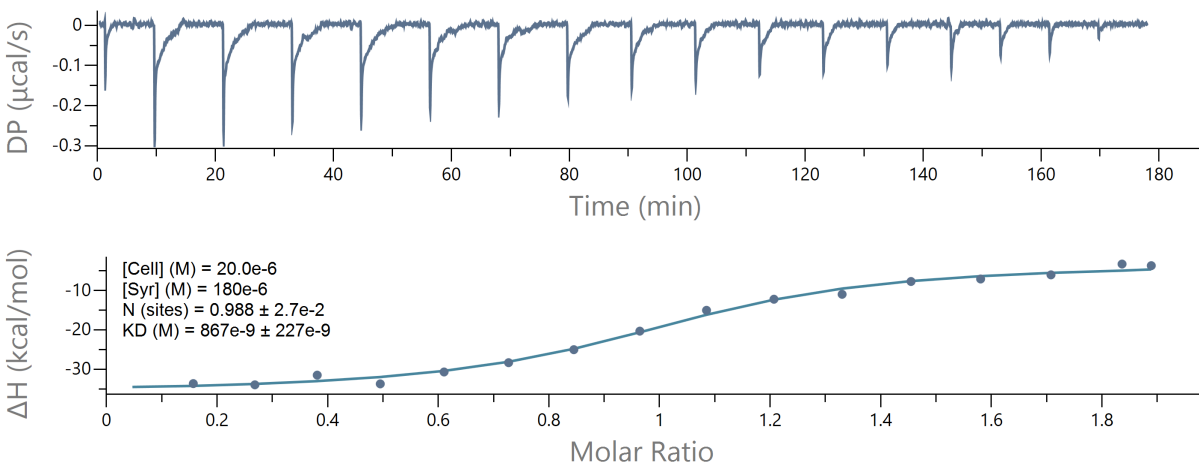

**Figure S16.** Representative ITC result of PNA1 against rHRP4.

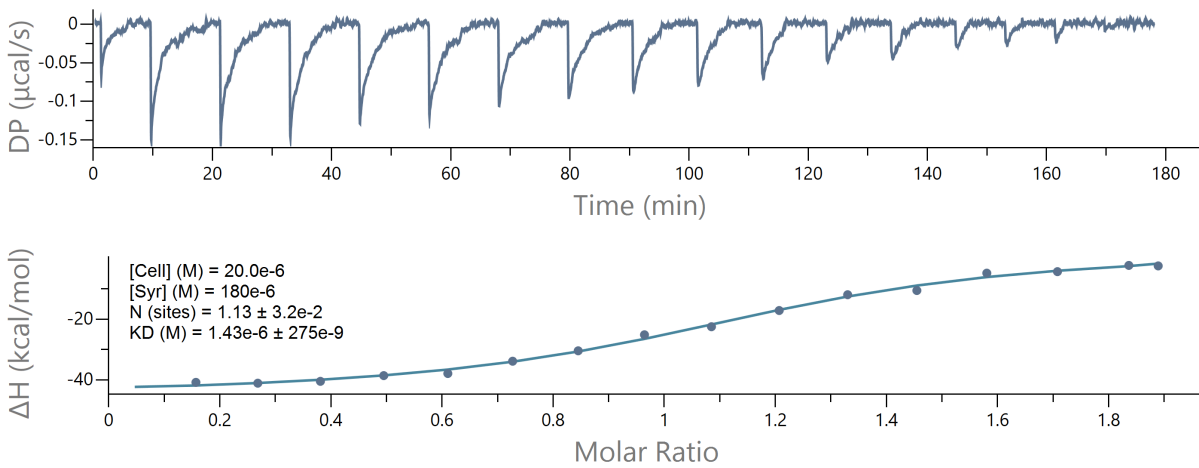

**Figure S17.** Representative ITC result of PNA1 against dHRP1.

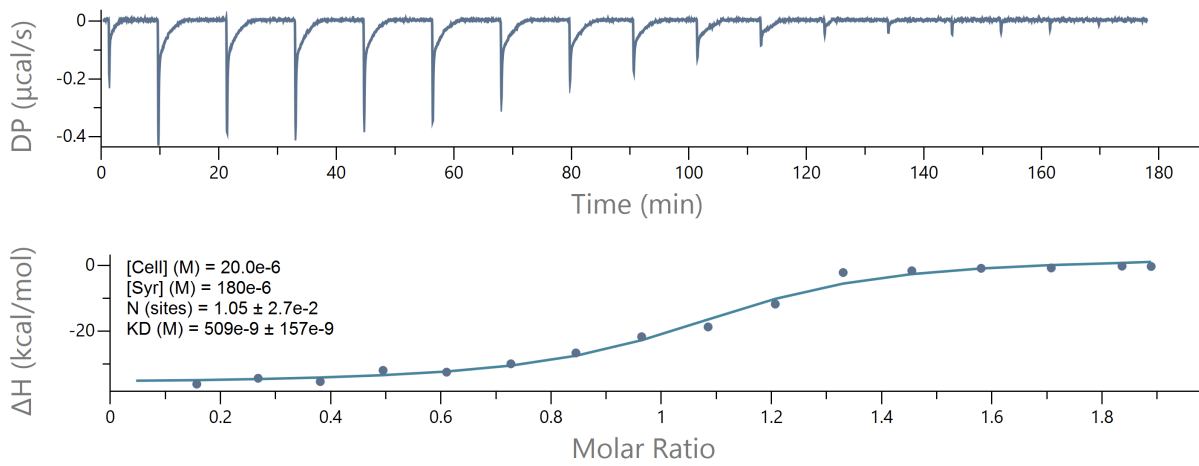

**Figure S18.** Representative ITC result of PNA2 against rHRP

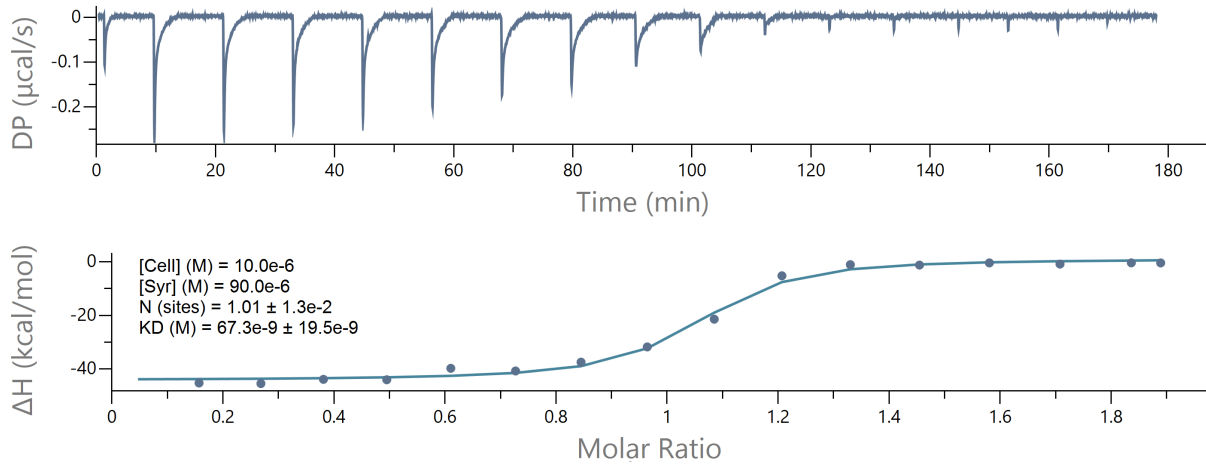

**Figure S19.** Representative ITC result of PNA2 against rHRP2.

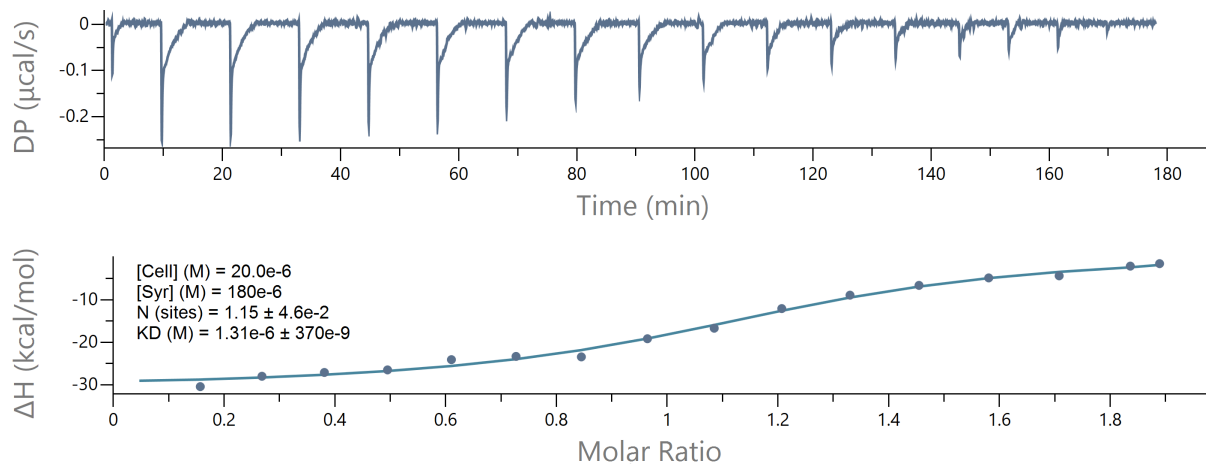

**Figure S20.** Representative ITC result of PNA2 against rHRP3.

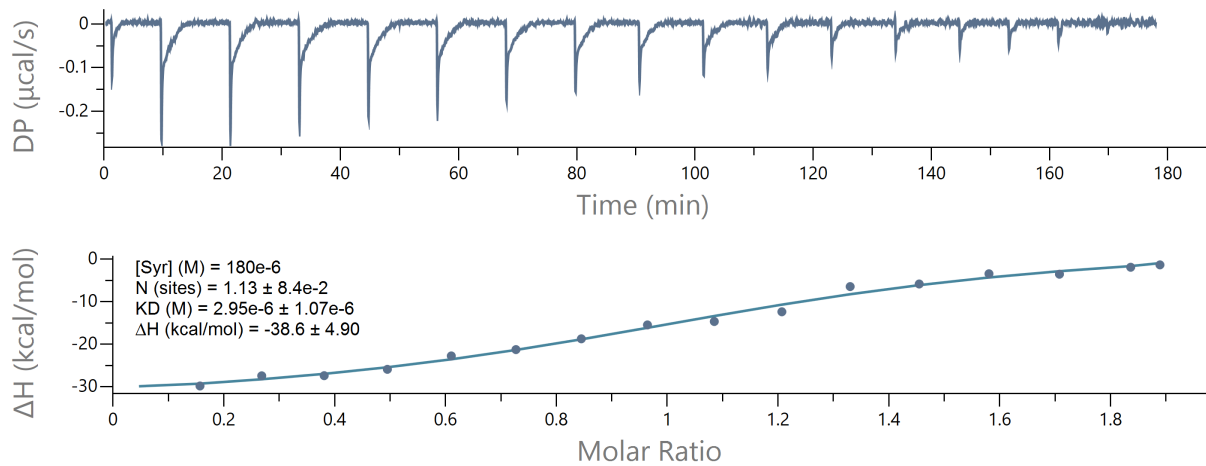

**Figure S21.** Representative ITC result of PNA2 against rHRP4.



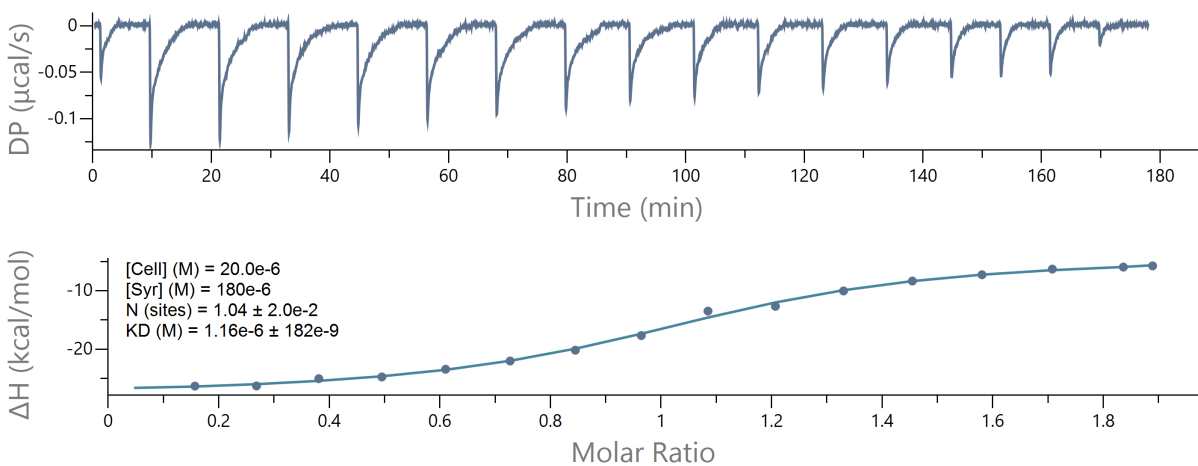

**Figure S22.** Representative ITC result of PNA2 against dHRP2.

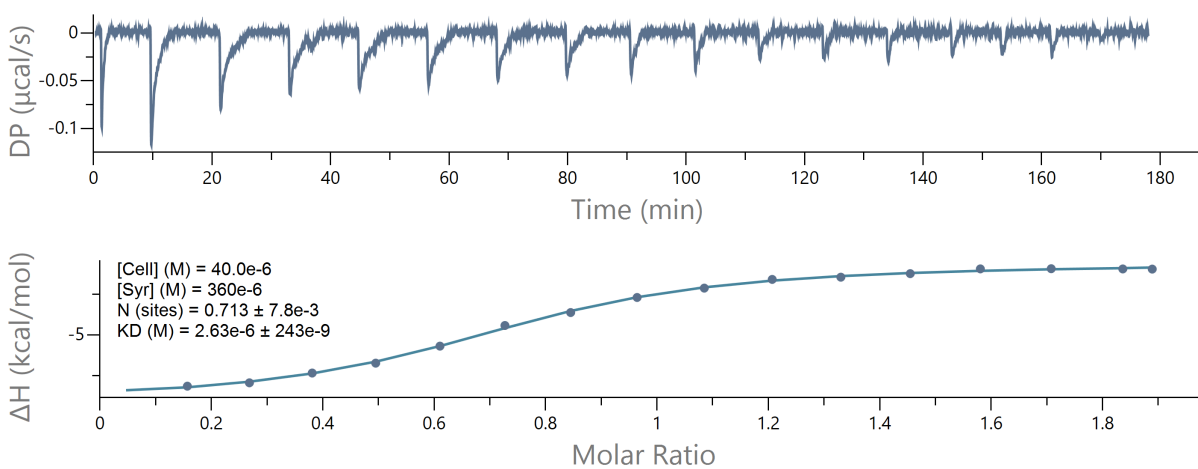

**Figure S23.** Representative ITC result of PNA3 against rHRP1.

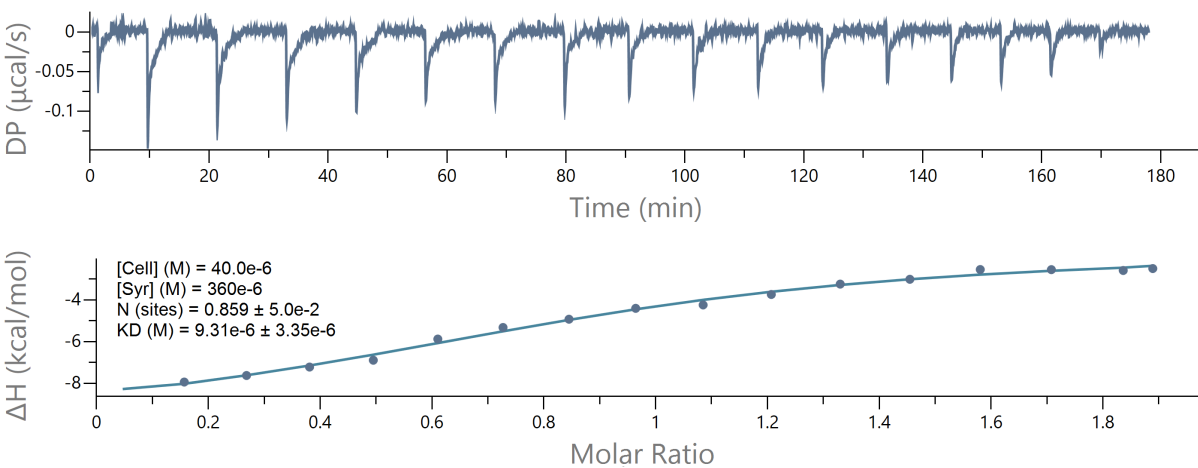

**Figure S24.** Representative ITC result of PNA3 against dHRP1.

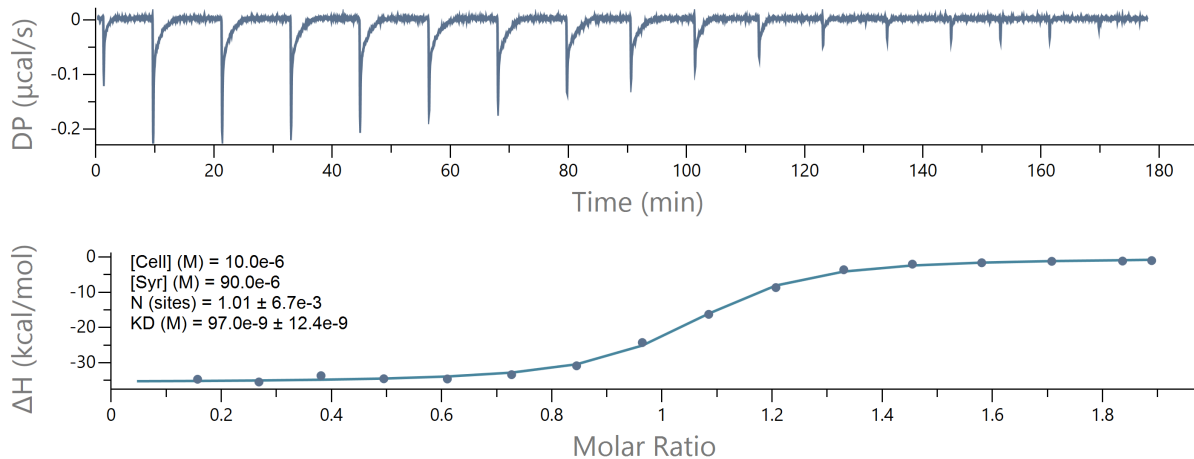

**Figure S25.** Representative ITC result of PNA4 against rHRP1.

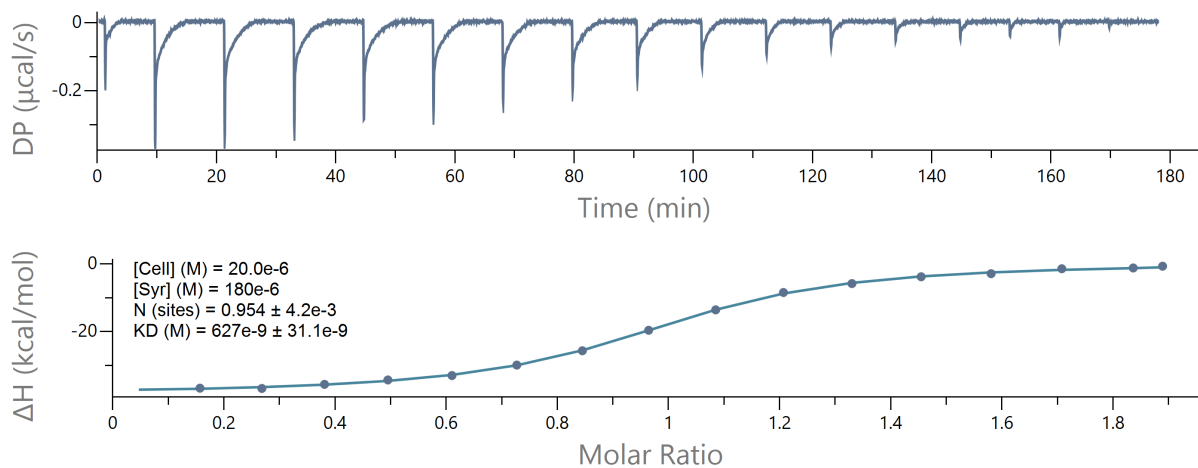

**Figure S26.** Representative ITC result of PNA4 against rHRP2.

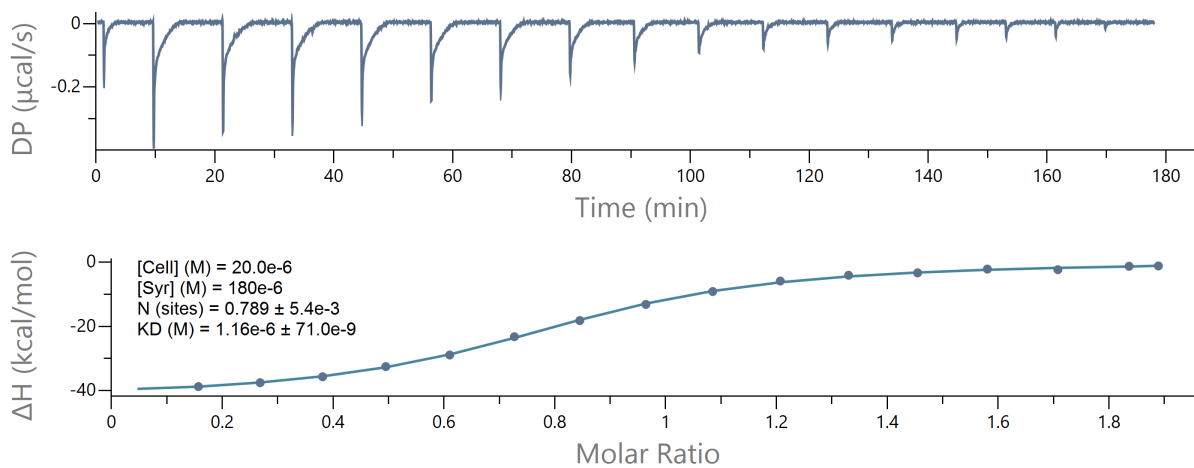

**Figure S27.** Representative ITC result of PNA4 against rHRP3.

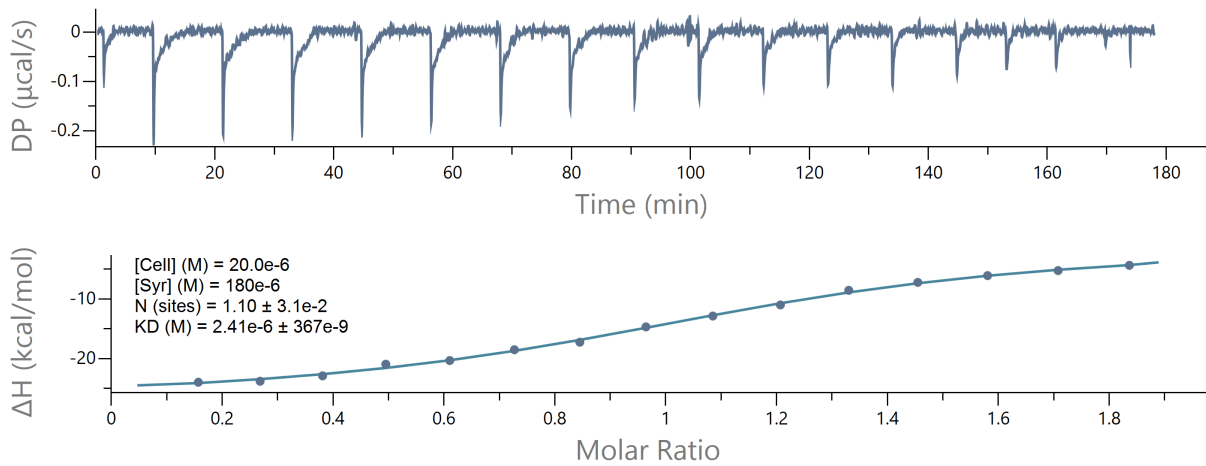

**Figure S28.** Representative ITC result of PNA4 against rHRP4.

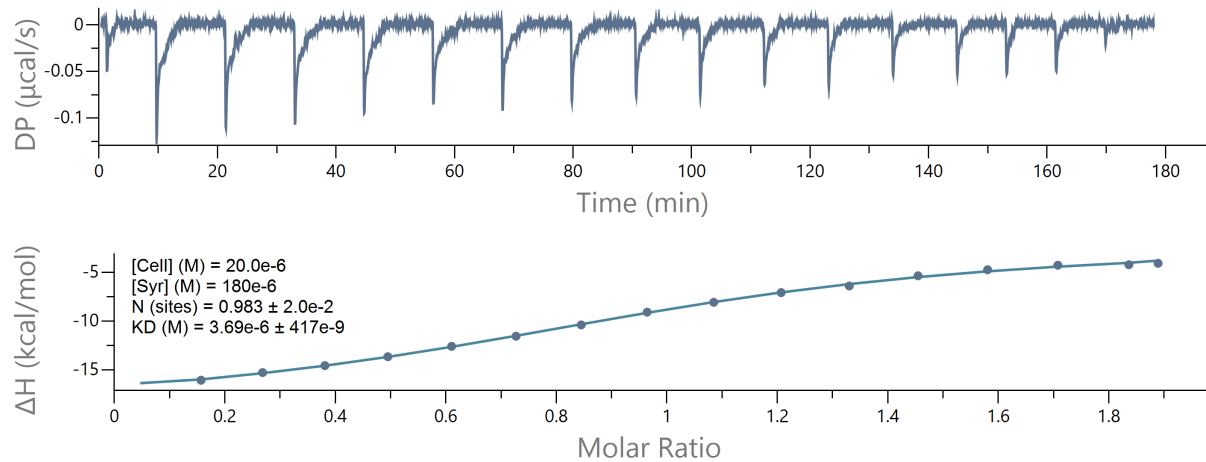

**Figure S29.** Representative ITC result of PNA4 against dHRP1.

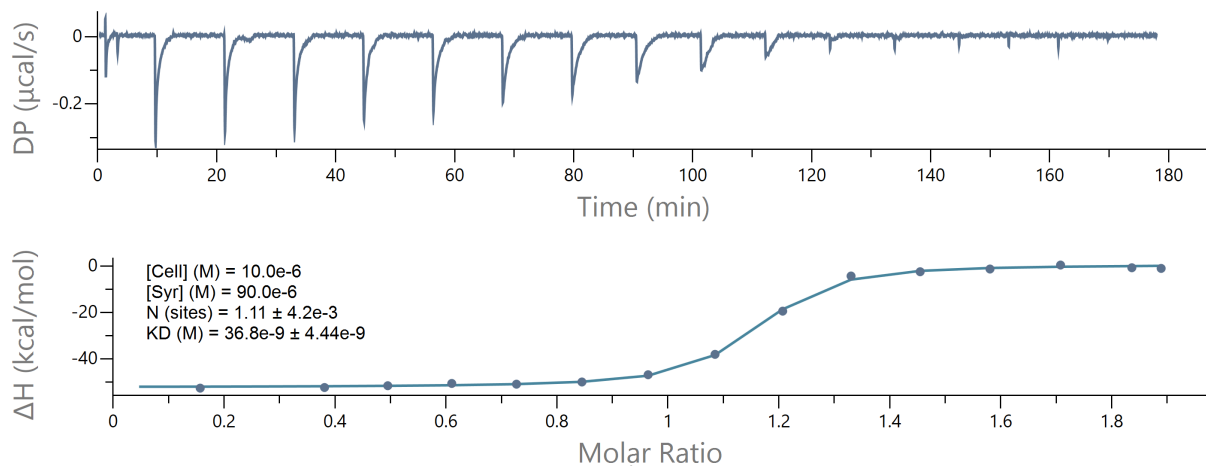

**Figure S30.** Representative ITC result of PNA5 against HRP5r.

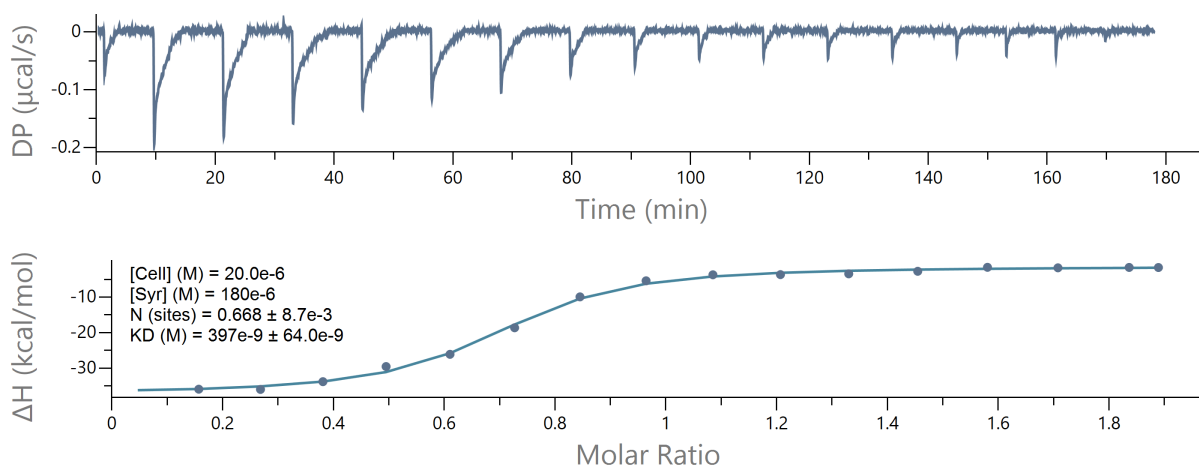

**Figure S31.** Representative ITC result of PNA5 against HRP5d.

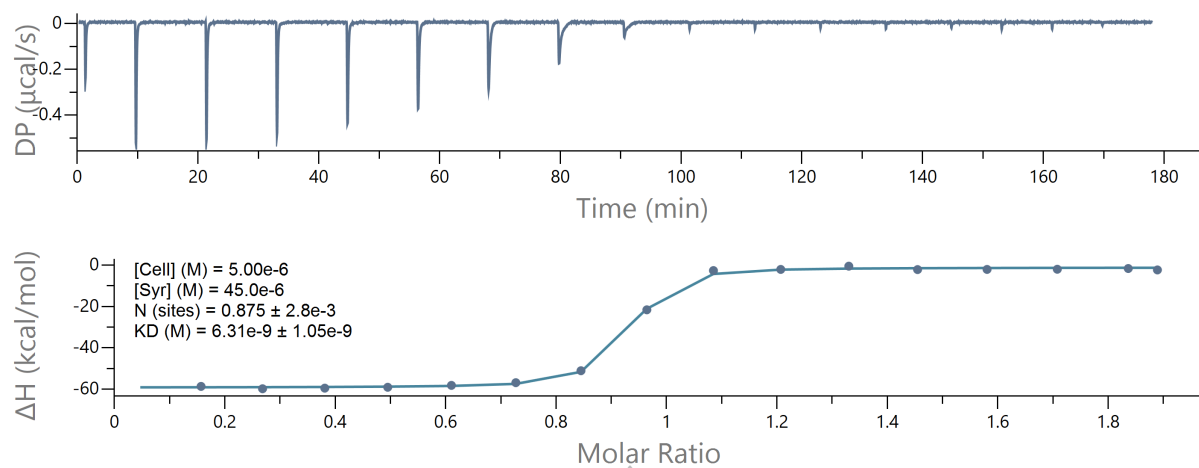

**Figure S32.** Representative ITC result of PNA10 against ssDNA<sub>5</sub>.

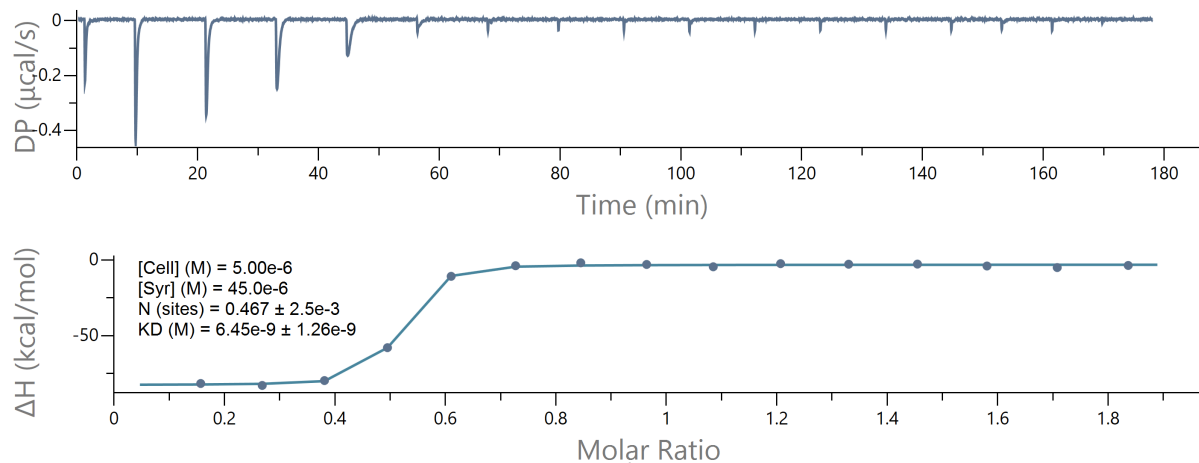

**Figure S33.** Representative ITC result of PNA11 against ssDNA<sub>5</sub>.

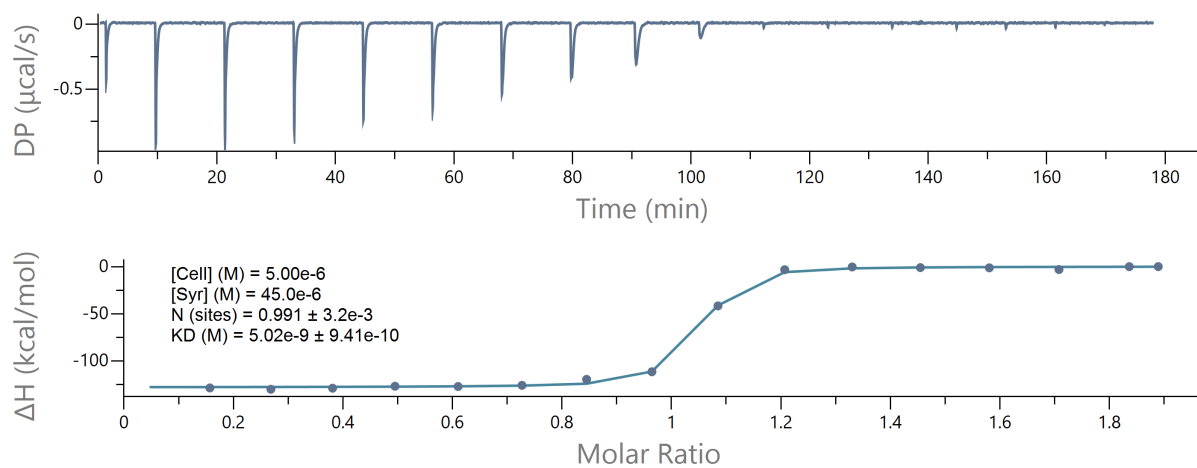

**Figure S34.** Representative ITC result of **PNA12** against **ssDNA<sub>5</sub>**.

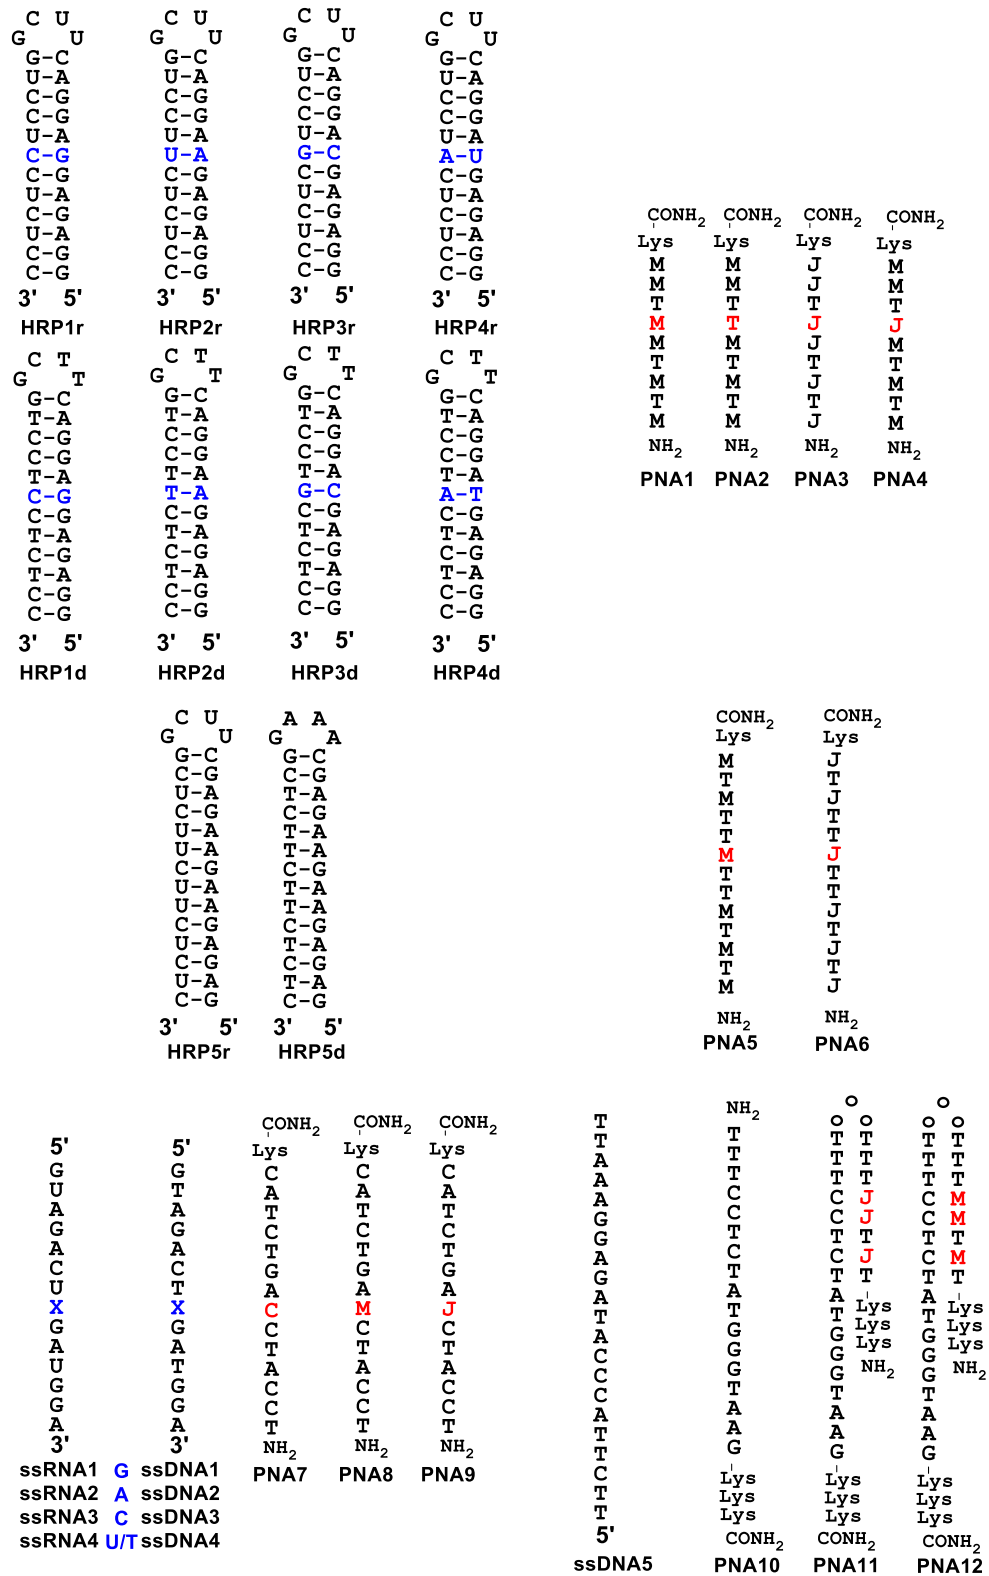

Figure S35. PNA and Oligonucleotide sequences.

Table S2. PNA1 binding affinity and thermodynamic data obtained by ITC.

| Name             | $K_d$ (M) | $K_a$ ( $M^{-1}$ ) | $\Delta H$ (kcal/mol) | $-T\Delta S$ (kcal/mol) | N (sites) |
|------------------|-----------|--------------------|-----------------------|-------------------------|-----------|
| PNA1 vs rHRP1 01 | 3.18E-08  | 3.14E+07           | -52.0                 | 41.8                    | 1.1       |
| PNA1 vs rHRP1 02 | 2.94E-08  | 3.40E+07           | -47.1                 | 36.8                    | 1.1       |
| PNA1 vs rHRP1 03 | 2.89E-08  | 3.46E+07           | -49.1                 | 38.8                    | 1.1       |
| Average          | 3.00E-08  | 3.34E+07           | -49.4                 | 39.1                    | 1.1       |
| St. Dev.         | 1.27E-09  | 1.37E+06           | 2.0                   | 2.1                     | 0.00      |
| PNA1 vs rHRP2 01 | 7.78E-07  | 1.29E+06           | -39.2                 | 30.8                    | 1.2       |
| PNA1 vs rHRP2 02 | 7.50E-07  | 1.33E+06           | -47.2                 | 38.8                    | 0.9       |
| PNA1 vs rHRP2 03 | 7.96E-07  | 1.26E+06           | -47.9                 | 39.6                    | 0.9       |
| Average          | 7.75E-07  | 1.29E+06           | -44.8                 | 36.4                    | 1.0       |
| St. Dev.         | 1.89E-08  | 3.18E+04           | 3.9                   | 4.0                     | 0.17      |
| PNA1 vs rHRP3 01 | 7.46E-07  | 1.34E+06           | -40.2                 | 31.8                    | 1.0       |
| PNA1 vs rHRP3 02 | 7.90E-07  | 1.27E+06           | -45.0                 | 36.6                    | 0.9       |
| PNA1 vs rHRP3 03 | 8.15E-07  | 1.23E+06           | -45.2                 | 36.9                    | 1.0       |
| Average          | 7.84E-07  | 1.28E+06           | -43.5                 | 35.1                    | 1.0       |
| St. Dev.         | 2.85E-08  | 4.71E+04           | 2.3                   | 2.3                     | 0.06      |
| PNA1 vs rHRP4 01 | 8.67E-07  | 1.15E+06           | -32.7                 | 24.5                    | 1.0       |
| PNA1 vs rHRP4 02 | 7.39E-07  | 1.35E+06           | -37.1                 | 28.7                    | 0.9       |
| PNA1 vs rHRP4 03 | 8.94E-07  | 1.12E+06           | -33.7                 | 25.4                    | 0.9       |
| Average          | 8.33E-07  | 1.21E+06           | -34.5                 | 26.2                    | 0.9       |
| St. Dev.         | 6.76E-08  | 1.03E+05           | 1.9                   | 1.8                     | 0.06      |
| PNA1 vs dHRP1 01 | 1.43E-06  | 6.99E+05           | -48.0                 | 40.0                    | 1.1       |
| PNA1 vs dHRP1 02 | 1.37E-06  | 7.30E+05           | -39.3                 | 31.3                    | 1.2       |
| PNA1 vs dHRP1 03 | 1.21E-06  | 8.26E+05           | -52.0                 | 43.9                    | 1.0       |
| Average          | 1.34E-06  | 7.52E+05           | -46.4                 | 38.4                    | 1.1       |
| St. Dev.         | 1.14E-07  | 6.64E+04           | 6.5                   | 6.5                     | 0.12      |

**Table S3. PNA2 binding affinity and thermodynamic data obtained by ITC.**

| Name             | $K_d$ (M) | $K_a$ ( $M^{-1}$ ) | $\Delta H$ (kcal/mol) | $-T\Delta S$ (kcal/mol) | N (sites) |
|------------------|-----------|--------------------|-----------------------|-------------------------|-----------|
| PNA2 vs rHRP1 01 | 5.92E-07  | 1.69E+06           | -38.8                 | 30.3                    | 1.0       |
| PNA2 vs rHRP1 02 | 5.09E-07  | 1.96E+06           | -38.5                 | 29.9                    | 1.1       |
| PNA2 vs rHRP1 03 | 5.11E-07  | 1.96E+06           | -40.5                 | 31.9                    | 1.0       |
| <b>Average</b>   | 5.37E-07  | 1.87E+06           | -39.3                 | 30.7                    | 1.0       |
| <b>St. Dev.</b>  | 3.87E-08  | 1.28E+05           | 0.9                   | 0.9                     | 0.06      |
| PNA2 vs rHRP2 01 | 7.98E-08  | 1.25E+07           | -42.4                 | 32.7                    | 1.0       |
| PNA2 vs rHRP2 02 | 8.34E-08  | 1.20E+07           | -41.4                 | 31.7                    | 1.1       |
| PNA2 vs rHRP2 03 | 8.44E-08  | 1.18E+07           | -40.4                 | 30.7                    | 1.1       |
| <b>Average</b>   | 8.25E-08  | 1.21E+07           | -41.4                 | 31.7                    | 1.1       |
| <b>St. Dev.</b>  | 1.98E-09  | 2.94E+05           | 0.8                   | 0.8                     | 0.06      |
| PNA2 vs rHRP3 01 | 9.64E-07  | 1.04E+06           | -33.9                 | 25.7                    | 1.1       |
| PNA2 vs rHRP3 02 | 1.04E-06  | 9.62E+05           | -33.9                 | 25.7                    | 1.1       |
| PNA2 vs rHRP3 03 | 1.31E-06  | 7.63E+05           | -32.0                 | 24.0                    | 1.2       |
| <b>Average</b>   | 1.10E-06  | 9.21E+05           | -33.3                 | 25.1                    | 1.1       |
| <b>St. Dev.</b>  | 1.48E-07  | 1.16E+05           | 0.9                   | 0.8                     | 0.06      |
| PNA2 vs rHRP4 01 | 2.40E-06  | 4.17E+05           | -39.2                 | 31.6                    | 1.1       |
| PNA2 vs rHRP4 02 | 2.19E-06  | 4.57E+05           | -37.1                 | 29.4                    | 1.1       |
| PNA2 vs rHRP4 03 | 2.95E-06  | 3.39E+05           | -38.6                 | 31.0                    | 1.1       |
| <b>Average</b>   | 2.51E-06  | 4.04E+05           | -38.3                 | 30.7                    | 1.1       |
| <b>St. Dev.</b>  | 3.20E-07  | 4.88E+04           | 0.9                   | 0.9                     | 0.00      |
| PNA2 vs dHRP2 01 | 1.03E-06  | 9.71E+05           | -23.0                 | 14.9                    | 1.0       |
| PNA2 vs dHRP2 02 | 9.98E-07  | 1.00E+06           | -25.5                 | 17.3                    | 1.1       |
| PNA2 vs dHRP2 03 | 1.16E-06  | 8.62E+05           | -23.9                 | 15.7                    | 1.0       |
| <b>Average</b>   | 1.06E-06  | 9.45E+05           | -24.1                 | 16.0                    | 1.1       |
| <b>St. Dev.</b>  | 8.58E-08  | 7.35E+04           | 1.3                   | 1.2                     | 0.03      |



Table S4. PNA3 binding affinity and thermodynamic data obtained by ITC.

| Name             | $K_d$ (M) | $K_a$ ( $M^{-1}$ ) | $\Delta H$ (kcal/mol) | $-T\Delta S$ (kcal/mol) | N (sites) |
|------------------|-----------|--------------------|-----------------------|-------------------------|-----------|
| PNA3 vs rHRP5 01 | 1.87E-06  | 5.35E+05           | -7.82                 | -1.6                    | 0.7       |
| PNA3 vs rHRP5 02 | 2.63E-06  | 3.80E+05           | -8.55                 | 0.9                     | 0.7       |
| PNA3 vs rHRP5 03 | 2.50E-06  | 4.00E+05           | -10.1                 | 2.4                     | 0.7       |
| Average          | 2.33E-06  | 4.38E+05           | -8.8                  | 0.6                     | 0.7       |
| St. Dev.         | 4.07E-07  | 8.41E+04           | 1.2                   | 2.0                     | 0.02      |
| PNA3 vs dHRP5 01 | 1.19E-05  | 8.40E+04           | -14.7                 | 8.0                     | 0.8       |
| PNA3 vs dHRP5 02 | 9.31E-06  | 1.07E+05           | -8.56                 | 1.7                     | 0.9       |
| Average          | 1.06E-05  | 9.57E+04           | -11.6                 | 4.9                     | 0.8       |
| St. Dev.         | 1.83E-06  | 1.65E+04           | 4.3                   | 4.5                     | 0.08      |

Table S5. PNA4 binding affinity and thermodynamic data obtained by ITC.

| Name              | $K_d$ (M) | $K_a$ ( $M^{-1}$ ) | $\Delta H$ (kcal/mol) | $-T\Delta S$ (kcal/mol) | N (sites) |
|-------------------|-----------|--------------------|-----------------------|-------------------------|-----------|
| PNA4 vs rHRP1 01  | 9.70E-08  | 1.03E+07           | -35.3                 | 25.7                    | 1.0       |
| PNA4 vs rHRP1 02  | 9.54E-08  | 1.05E+07           | -34.7                 | 25.1                    | 1.0       |
| PNA4 vs rHRP1 03  | 9.07E-08  | 1.10E+07           | -36.4                 | 27.1                    | 1.0       |
| Average           | 9.44E-08  | 1.06E+07           | -35.5                 | 26.0                    | 1.0       |
| St. Dev.          | 3.27E-09  | 3.74E+05           | 0.9                   | 1.0                     | 0.01      |
| PNA4 vs rHRP2 01  | 8.31E-07  | 1.20E+06           | -30.3                 | 21.7                    | 0.9       |
| PNA4 vs rHRP2 02  | 5.24E-07  | 1.91E+06           | -43.6                 | 35.1                    | 0.5       |
| PNA4 vs rHRP2 03  | 6.27E-07  | 1.60E+06           | -38.7                 | 30.2                    | 1.0       |
| Average           | 6.61E-07  | 1.57E+06           | -37.5                 | 29.0                    | 0.8       |
| St. Dev.          | 1.56E-07  | 3.53E+05           | 6.7                   | 6.8                     | 0.27      |
| PNA4 vs rHRP3 01  | 1.16E-06  | 8.62E+05           | -42.9                 | 34.8                    | 0.8       |
| PNA4 vs rHRP3 02  | 1.06E-06  | 9.43E+05           | -51.5                 | 43.4                    | 0.9       |
| PNA4 vs rHRP3r 03 | 1.29E-06  | 7.75E+05           | -40.7                 | 32.4                    | 0.8       |
| Average           | 1.17E-06  | 8.60E+05           | -45.0                 | 36.9                    | 0.8       |
| St. Dev.          | 1.15E-07  | 8.41E+04           | 5.8                   | 5.8                     | 0.09      |
| PNA4 vs rHRP4 01  | 2.89E-06  | 3.45E+05           | -28.9                 | 21.3                    | 1.2       |
| PNA4 vs rHRP4 02  | 2.68E-06  | 3.73E+05           | -19.5                 | 11.9                    | 0.7       |
| PNA4 vsr HRP4 03  | 2.41E-06  | 4.15E+05           | -26.3                 | 18.7                    | 1.1       |
| Average           | 2.66E-06  | 3.80E+05           | -24.9                 | 17.3                    | 1.0       |
| St. Dev.          | 2.41E-07  | 4.87E+04           | 4.9                   | 4.9                     | 0.24      |
| PNA4 vs dHRP1 01  | 4.92E-06  | 2.03E+05           | -27.0                 | 19.7                    | 1.1       |
| PNA4 vs dHRP1 02  | 3.69E-06  | 2.71E+05           | -17.2                 | 9.8                     | 1.0       |
| PNA4 vs dHRP1 03  | 5.10E-06  | 1.96E+05           | -22.2                 | 15.0                    | 1.1       |
| Average           | 4.57E-06  | 2.23E+05           | -22.1                 | 14.8                    | 1.1       |
| St. Dev.          | 7.67E-07  | 4.13E+04           | 4.9                   | 5.0                     | 0.06      |

**Table S6.** UV-melting of **PNA1** vs matched and mismatched dsRNA and dsDNA.

| Name                                | PNA1 vs rHRP1 | PNA1 vs rHRP2 | PNA1 vs rHRP3 | PNA1 vs rHRP4 |
|-------------------------------------|---------------|---------------|---------------|---------------|
| <b>Melting</b><br><b>temp. (°C)</b> | 67.1          | 36.2          | 36.6          | 32.9          |
|                                     | 67.3          | 36.2          | 37.3          | 32.8          |
|                                     | 66.2          | 35.8          | 36.2          | 32.8          |
|                                     | 66.5          | 36.2          | 37.2          | 31.8          |
|                                     | 65.6          | 36.9          | 36.9          | 32.6          |
| <b>Average</b>                      | 66.5          | 36.3          | 36.8          | 32.6          |
| <b>St. Dev.</b>                     | 0.7           | 0.4           | 0.4           | 0.4           |
| Name                                | PNA1 vs dHRP1 | PNA1 vs dHRP2 | PNA1 vs dHRP3 | PNA1 vs dHRP4 |
| <b>Melting</b><br><b>temp. (°C)</b> | 35.2          | <20           | <20           | <20           |
|                                     | 34.5          | <20           | <20           | <20           |
|                                     | 35.5          | <20           | <20           | <20           |
|                                     | 35.0          | <20           | <20           | <20           |
|                                     | 34.8          | <20           | <20           | <20           |
| <b>Average</b>                      | 35.0          | -             | -             | -             |
| <b>St. Dev.</b>                     | 0.3           | -             | -             | -             |

**Table S7.** UV-melting of **PNA2** vs matched and mismatched dsRNA and dsDNA.

| Name                                | PNA2 vs rHRP1 | PNA2 vs rHRP2 | PNA2 vs rHRP3 | PNA2 vs rHRP4 |
|-------------------------------------|---------------|---------------|---------------|---------------|
| <b>Melting</b><br><b>temp. (°C)</b> | 46.4          | 70.1          | 35.4          | 34.7          |
|                                     | 46.8          | 70.1          | 35.2          | 34.5          |
|                                     | 46.5          | 70.4          | 36.0          | 34.3          |
|                                     | 45.6          | 68.7          | 35.6          | 34.8          |
|                                     | 46.9          | 68.6          | 34.7          | 34.7          |
| <b>Average</b>                      | 46.4          | 69.6          | 35.4          | 34.6          |
| <b>St. Dev.</b>                     | 0.5           | 0.8           | 0.4           | 0.2           |
| Name                                | PNA2 vs dHRP1 | PNA2 vs dHRP2 | PNA2 vs dHRP3 | PNA2 vs dHRP4 |
| <b>Melting</b><br><b>temp. (°C)</b> | <20           | 29.7          | <20           | <20           |
|                                     | <20           | 29.9          | <20           | <20           |
|                                     | <20           | 29.0          | <20           | <20           |
|                                     | <20           | 28.9          | <20           | <20           |
|                                     | <20           | 29.6          | <20           | <20           |
| <b>Average</b>                      | -             | 29.4          | -             | -             |
| <b>St. Dev.</b>                     | -             | 0.4           | -             | -             |

**Table S8.** UV-melting of **PNA3** vs matched dsRNA and dsDNA.

| Name                          | PNA3 vs rHRP1 |
|-------------------------------|---------------|
| <b>Melting<br/>temp. (°C)</b> | 37.6          |
|                               | 36.3          |
|                               | 36.9          |
|                               | 36.4          |
|                               | 37.0          |
| <b>Average<br/>St. Dev.</b>   | 36.8<br>0.5   |
| Name                          | PNA3 vs dHRP1 |
| <b>Melting<br/>temp. (°C)</b> | <20           |
|                               | <20           |
|                               | <20           |
|                               | <20           |
|                               | <20           |
| <b>Average<br/>St. Dev.</b>   | -<br>-        |

**Table S9.** UV-melting of **PNA4** vs matched and mismatched dsRNA and dsDNA.

| Name                          | PNA4 vs rHRP1 | PNA4 vs rHRP2 | PNA4 vs rHRP3 | PNA4 vs rHRP4 |
|-------------------------------|---------------|---------------|---------------|---------------|
| <b>Melting<br/>temp. (°C)</b> | 60.0          | 43.8          | 39.4          | 35.1          |
|                               | 60.8          | 44.1          | 39.3          | 35.4          |
|                               | 61.4          | 43.5          | 38.9          | 36.4          |
|                               | 60.3          | 44.6          | 38.7          | 35.8          |
|                               | 61.1          | 43.1          | 39.3          | 35.8          |
| <b>Average<br/>St. Dev.</b>   | 60.7<br>0.6   | 43.8<br>0.6   | 39.1<br>0.3   | 35.7<br>0.5   |
| Name                          | PNA4 vs dHRP1 | PNA4 vs dHRP2 | PNA4 vs dHRP3 | PNA4 vs dHRP4 |
| <b>Melting<br/>temp. (°C)</b> | 29.4          | <20           | <20           | <20           |
|                               | 30.2          | <20           | <20           | <20           |
|                               | 29.7          | <20           | <20           | <20           |
|                               | 29.8          | <20           | <20           | <20           |
|                               | 29.5          | <20           | <20           | <20           |
| <b>Average<br/>St. Dev.</b>   | 29.7<br>0.3   | -<br>-        | -<br>-        | -<br>-        |

**Table S10.** PNA5 binding affinity and thermodynamic data obtained by ITC.

| Name             | $K_d$ (M) | $K_a$ ( $M^{-1}$ ) | $\Delta H$ (kcal/mol) | $-T\Delta S$ (kcal/mol) | N (sites) |
|------------------|-----------|--------------------|-----------------------|-------------------------|-----------|
| PNA5 vs HRP5r 01 | 3.68E-06  | 2.72E+07           | -53.4                 | 42.7                    | 0.8       |
| PNA5 vs HRP5r 02 | 3.55E-06  | 2.82E+07           | -57.2                 | 43.2                    | 0.7       |
| PNA5 vs HRP5r 03 | 3.66E-06  | 2.73E+07           | -54.5                 | 47.0                    | 0.8       |
| <b>Average</b>   | 3.84E-06  | 2.76E+07           | -54.5                 | 44.3                    | 0.7       |
| <b>St. Dev.</b>  | 7.73E-07  | 5.37E+05           | 2.4                   | 2.4                     | 0.06      |
| PNA5 vs HRP5d 01 | 4.54E-07  | 2.20E+06           | -34.6                 | 26.0                    | 1.1       |
| PNA5 vs HRP5d 02 | 3.97E-07  | 2.52E+06           | -35.9                 | 27.2                    | 1.1       |
| PNA5 vs HRP5d 03 | 3.01E-07  | 3.32E+06           | -35.3                 | 26.4                    | 1.1       |
| <b>Average</b>   | 3.63E-07  | 2.68E+06           | -35.3                 | 26.5                    | 1.1       |
| <b>St. Dev.</b>  | 7.00E-08  | 5.77E+05           | 0.7                   | 0.6                     | 0.01      |

**Table S11.** UV-melting of PNA5 vs matched dsRNA and dsDNA

| Name                      | PNA5 vs HRP5r | PNA5 vs HRP5d |
|---------------------------|---------------|---------------|
| <b>Melting temp. (°C)</b> | 90.7          | 85.9          |
|                           | 90.2          | 87.0          |
|                           | 89.8          | 86.5          |
|                           | 89.9          | 87.5          |
|                           | 89.0          | 87.1          |
| <b>Average</b>            | 89.9          | 86.8          |
| <b>St. Dev.</b>           | 0.6           | 0.6           |

**Table S12.** UV-melting of **PNA7** vs matched and mismatched ssRNA and ssDNA.

| Name                                | PNA7 vs ssRNA1 | PNA7 vs ssRNA2 | PNA7 vs ssRNA3 | PNA7 vs ssRNA4 |
|-------------------------------------|----------------|----------------|----------------|----------------|
| <b>Melting</b><br><b>temp. (°C)</b> | 73.3           | 58.2           | 56.9           | 57.2           |
|                                     | 72.8           | 58.1           | 56.7           | 56.9           |
|                                     | 73.1           | 57.5           | 56.3           | 56.4           |
|                                     | 73.8           | 57.8           | 56.0           | 56.7           |
|                                     | 72.4           | 57.3           | 55.9           | 56.9           |
| <b>Average</b>                      | 73.2           | 57.8           | 56.4           | 56.8           |
| <b>St. Dev.</b>                     | 0.5            | 0.4            | 0.4            | 0.3            |
| Name                                | PNA7 vs ssDNA1 | PNA7 vs ssDNA2 | PNA7 vs ssDNA3 | PNA7 vs ssDNA4 |
| <b>Melting</b><br><b>temp. (°C)</b> | 66.9           | 46.1           | 45.0           | 47.8           |
|                                     | 65.5           | 46.2           | 44.2           | 47.5           |
|                                     | 66.6           | 45.7           | 44.4           | 47.1           |
|                                     | 65.2           | 45.2           | 44.4           | 47.3           |
|                                     | 66.0           | 44.9           | 44.7           | 47.3           |
| <b>Average</b>                      | 66.0           | 45.6           | 44.5           | 47.4           |
| <b>St. Dev.</b>                     | 0.7            | 0.5            | 0.3            | 0.3            |

**Table S13.** UV-melting of **PNA8** vs matched and mismatched ssRNA and ssDNA.

| Name                                | PNA8 vs ssRNA1 | PNA8 vs ssRNA2 | PNA8 vs ssRNA3 | PNA8 vs ssRNA4 |
|-------------------------------------|----------------|----------------|----------------|----------------|
| <b>Melting</b><br><b>temp. (°C)</b> | 59.9           | 55.7           | 57.7           | 56.1           |
|                                     | 58.4           | 55.7           | 57.0           | 56.5           |
|                                     | 59.5           | 55.4           | 56.4           | 55.1           |
|                                     | 58.3           | 55.4           | 56.6           | 56.0           |
|                                     | 59.5           | 54.9           | 56.0           | 55.2           |
| <b>Average</b>                      | 59.1           | 55.4           | 56.8           | 55.8           |
| <b>St. Dev.</b>                     | 0.7            | 0.3            | 0.6            | 0.6            |
| Name                                | PNA8 vs ssDNA1 | PNA8 vs ssDNA2 | PNA8 vs ssDNA3 | PNA8 vs ssDNA4 |
| <b>Melting</b><br><b>temp. (°C)</b> | 45.0           | 42.4           | 46.8           | 46.0           |
|                                     | 45.6           | 41.2           | 47.0           | 45.9           |
|                                     | 45.4           | 41.9           | 46.2           | 45.2           |
|                                     | 45.2           | 41.1           | 46.3           | 45.2           |
|                                     | 45.2           | 41.1           | 46.0           | 45.4           |
| <b>Average</b>                      | 45.3           | 41.5           | 46.5           | 45.6           |
| <b>St. Dev.</b>                     | 0.2            | 0.6            | 0.4            | 0.4            |

**Table S14.** UV-melting of **PNA9** vs matched and mismatched ssRNA and ssDNA.

| <b>Name</b>                   | <b>PNA9 vs ssRNA1</b> | <b>PNA9 vs ssRNA2</b> | <b>PNA9 vs ssRNA3</b> | <b>PNA9 vs ssRNA4</b> |
|-------------------------------|-----------------------|-----------------------|-----------------------|-----------------------|
| <b>Melting<br/>temp. (°C)</b> | 73.0                  | 58.1                  | 58.4                  | 58.9                  |
|                               | 72.0                  | 57.7                  | 58.1                  | 59.0                  |
|                               | 71.8                  | 57.3                  | 58.0                  | 58.2                  |
|                               | 72.7                  | 56.9                  | 57.8                  | 58.6                  |
|                               | 71.4                  | 56.9                  | 57.5                  | 57.8                  |
| <b>Average</b>                | 72.2                  | 57.4                  | 58.0                  | 58.5                  |
| <b>St. Dev.</b>               | 0.6                   | 0.5                   | 0.4                   | 0.5                   |
| <b>Name</b>                   | <b>PNA9 vs ssDNA1</b> | <b>PNA9 vs ssDNA2</b> | <b>PNA9 vs ssDNA3</b> | <b>PNA9 vs ssDNA4</b> |
| <b>Melting<br/>temp. (°C)</b> | 67.1                  | 46.5                  | 49.0                  | 49.9                  |
|                               | 65.8                  | 45.5                  | 49.4                  | 49.9                  |
|                               | 66.6                  | 45.9                  | 48.7                  | 49.8                  |
|                               | 65.9                  | 45.6                  | 48.7                  | 49.7                  |
|                               | 66.2                  | 46.2                  | 48.6                  | 49.3                  |
| <b>Average</b>                | 66.3                  | 45.9                  | 48.9                  | 49.7                  |
| <b>St. Dev.</b>               | 0.5                   | 0.4                   | 0.3                   | 0.2                   |

**Table S15. PNA10-PNA12 binding affinity and thermodynamic data obtained by ITC.**

| Name                      | $K_d$ (M) | $K_a$ ( $M^{-1}$ ) | $\Delta H$ (kcal/mol) | $-T\Delta S$ (kcal/mol) | N (sites) |
|---------------------------|-----------|--------------------|-----------------------|-------------------------|-----------|
| <b>PNA10 vs ssDNA5 01</b> | 6.67E-9   | 1.49E+8            | -65.9                 | 54.7                    | 0.8       |
| <b>PNA10 vs ssDNA5 02</b> | 6.29E-9   | 1.59E+8            | -65.8                 | 54.6                    | 0.6       |
| <b>PNA10 vs ssDNA5 03</b> | 6.31E-9   | 1.58E+8            | -58.0                 | 46.8                    | 0.9       |
| <b>Average</b>            | 6.42E-9   | 1.56E+8            | -63.2                 | 52.0                    | 0.8       |
| <b>St. Dev.</b>           | 2.14E-10  | 5.09E+6            | 4.5                   | 4.5                     | 0.13      |
| <b>PNA11 vs ssDNA5 01</b> | 6.93E-9   | 1.44E+8            | -79.4                 | 68.3                    | 0.4       |
| <b>PNA11 vs ssDNA5 02</b> | 6.45E-9   | 1.55E+8            | -79.5                 | 68.3                    | 0.5       |
| <b>PNA11 vs ssDNA5 03</b> | 6.89E-9   | 1.45E+8            | -97.9                 | 86.8                    | 0.4       |
| <b>Average</b>            | 6.76E-9   | 1.48E+8            | -85                   | 75                      | 0.42      |
| <b>St. Dev.</b>           | 2.66E-10  | 5.97E+6            | 11                    | 11                      | 0.06      |
| <b>PNA12 vs ssDNA5 01</b> | 5.14E-9   | 1.95E+8            | -140                  | 128                     | 1.0       |
| <b>PNA12 vs ssDNA5 02</b> | 5.02E-9   | 1.99E+8            | -128                  | 117                     | 1.0       |
| <b>PNA12 vs ssDNA5 03</b> | 5.33E-9   | 1.88E+8            | -137                  | 125                     | 1.0       |
| <b>Average</b>            | 5.16E-9   | 1.95E+8            | -135                  | 123                     | 1.0       |
| <b>St. Dev.</b>           | 1.56E-10  | 5.83E+6            | 6.2                   | 5.7                     | 0.03      |

**Table S16. UV-melting of PNA10-PNA12 vs matched ssDNA5.**

| Name                      | $T_m$ ( $^{\circ}C$ ) |
|---------------------------|-----------------------|
| <b>PNA10 vs ssDNA5 01</b> | 76.6                  |
| <b>PNA10 vs ssDNA5 02</b> | 76.8                  |
| <b>PNA10 vs ssDNA5 03</b> | 76.1                  |
| <b>PNA10 vs ssDNA5 04</b> | 76.3                  |
| <b>PNA10 vs ssDNA5 05</b> | 76.6                  |
| <b>Average</b>            | 76.4                  |
| <b>St. Dev.</b>           | 0.3                   |
| <b>PNA11 vs ssDNA5 01</b> | 91.4                  |
| <b>PNA11 vs ssDNA5 02</b> | 91.5                  |
| <b>PNA11 vs ssDNA5 03</b> | 90.1                  |
| <b>PNA11 vs ssDNA5 04</b> | 91.2                  |
| <b>PNA11 vs ssDNA5 05</b> | 90.5                  |
| <b>Average</b>            | 91.0                  |
| <b>St. Dev.</b>           | 0.6                   |
| <b>PNA12 vs ssDNA5 01</b> | 93.7                  |
| <b>PNA12 vs ssDNA5 02</b> | 94.1                  |
| <b>PNA12 vs ssDNA5 03</b> | 94.2                  |
| <b>PNA12 vs ssDNA5 04</b> | 93.9                  |
| <b>PNA12 vs ssDNA5 05</b> | 94.5                  |
| <b>Average</b>            | 94.1                  |
| <b>St. Dev.</b>           | 0.3                   |

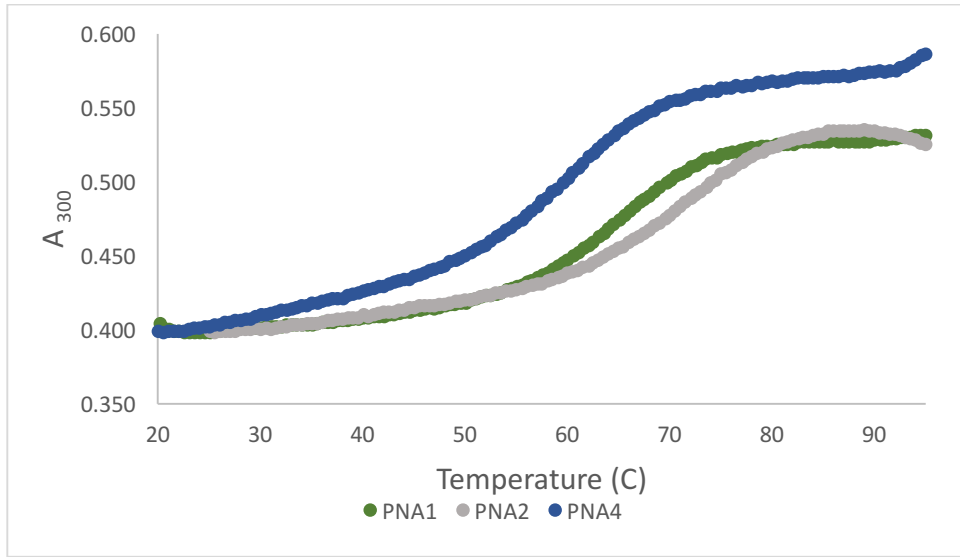

Figure S36. UV-melting at 300 nm of **PNA1** (M), **PNA2** (T), and **PNA4** (J) against matched dsRNA.

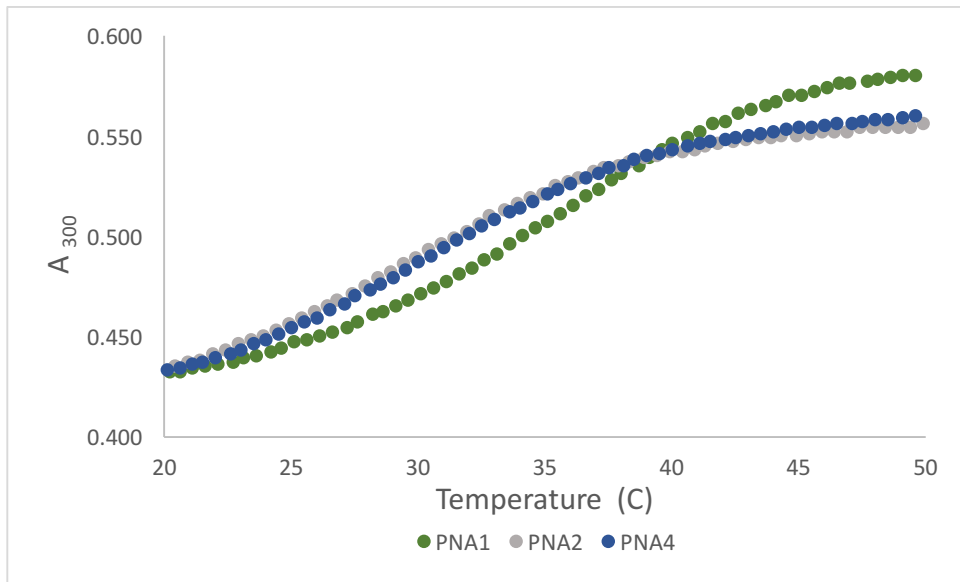

Figure S37. UV-melting at 300 nm of **PNA1** (M), **PNA2** (T), and **PNA4** (J) against matched dsDNA.



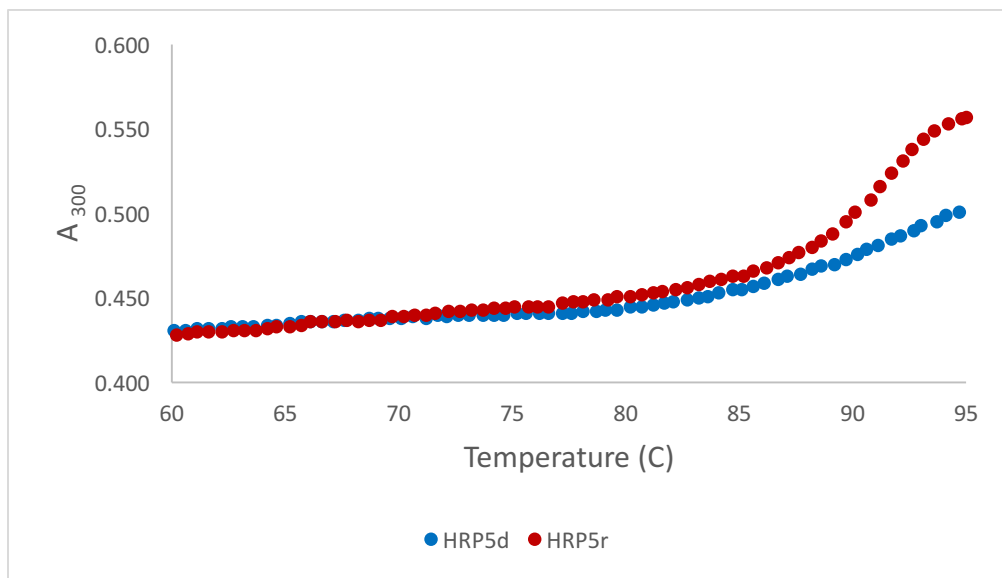

**Figure S38.** UV-melting at 300 nm of PNA5 against matched dsDNA and dsRNA.

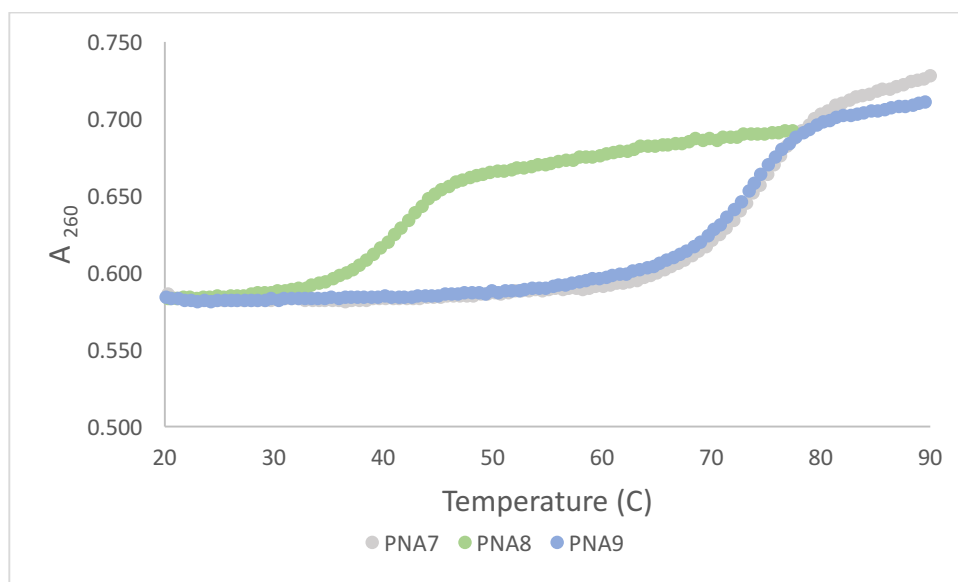

**Figure S39.** UV-melting at 260 nm of **PNA7** (C), **PNA8** (J), and **PNA9** (J) against matched ssRNA1.

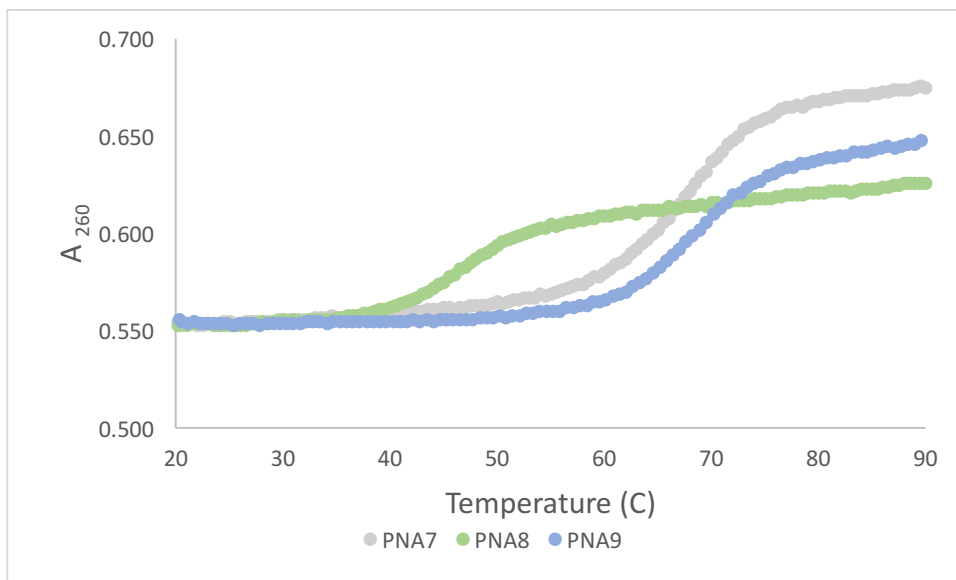

**Figure S40.** UV-melting at 260 nm of **PNA7** (C), **PNA8** (M), and **PNA9** (J) against matched ssDNA1.

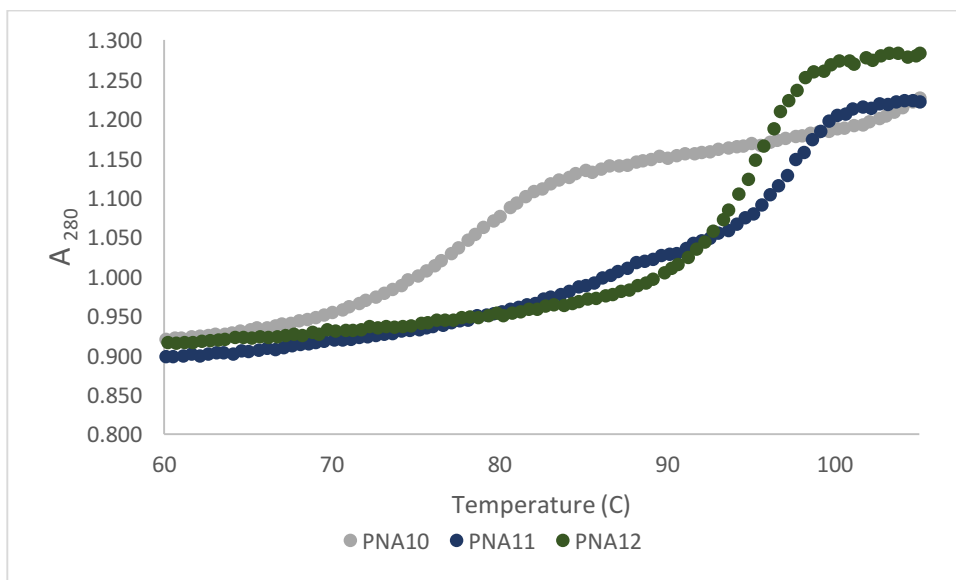

**Figure S41.** UV-melting at 280nm of **PNA10**, **PNA11**, and **PNA12** against ssDNA5.
